# Supplementary material for: The repertoire of G protein-coupled receptors in the sea squirt Ciona intestinalis
Source: Springer Nature journal article supplement (doi:10.1186/1471-2148-8-129), 2008-05-01
Supplement: Additional file 1 [file 1471-2148-8-129-s1.pdf]

>ci0100130008

MKEFLVWSKMNRTTKLKLNGACTVPLSMKGINLKRVKIKRLKCGVWGCTISSNISFVSKHTEIKVLKTTA  
KYCDRVNVTNDMGNFTWHEAVTVTVRYNCTEPQQEVSMTENLDPGLDLYSLSVLPQKLHVHNCIKYRT  
GYTCDTTQMMLERNISRENAWSVCSNAVGNLSGVIVRDSIGFQLLGEVIGNCSEHLQENMKSSNIALAGY  
NFNVTDQKYIYCSISEAIEWTELTKYPELELVCQDLLLLFNFSILLFFHSFLFFILHTYITITVTLGVFVA  
TTFKTIHLLHPGFKSKTAFSLLLLFVHTNMRHLPILHRNGLFQSSTTTTTMSLMEYKAWKNHLQSSQED  
KGIKIVAKQVDFLADMTKFKQELKKNIKPDPERHVLVSSISYVHVNNRNVNLTKPAVYIFHTQESVSQLN  
LDYEHYIAMWNGSGWNRAHHHCIFNHTTRDQQQHNITVIQCDVLATFAIMKVTLTHPTVYAGSAVLTLT  
LLLLMLITYAVFRNLLSRDARHMIINTTLHLLVAVLTFVTGVVWSISSKVMCYVTGILLHYSSLSVLLWIT  
LSSGNICKEMLAQQPPLLEPKPSKPMPLRFYLIGCGIPIIICGITASAKIENYNGDGGQYCWLSWETSLEY  
AFYAPAACIAIFCIVLLRILATLNCAPSGEMKRKSRKRKRREYSKEFIGEDTPLYMESSFTQHSNPVN  
NSFSKDVENEQSSKTRLQGVALLVLFITTWVTAAMTVAAPRIQEQKISSHVRQTLFNQNYFKFFKQEEP  
TPSIDLHLIFSCIFAMMCIAMSSFLLIQHLLTSRSDVRRSWRNLCNRRKKKVLEAESNIQINNDIATNIPD  
RKRENTVTTAATDPTTTETALHLLTTGGESSRGNLTSRHS PFGRNSSAPLPGGTYDTSRASSAHKCAQFHR  
EKALSNTLTESGLLVPHSNSLLLLSPDPNNFYTLTEHQHGD SFHSPSQEWGYHGYQHYYKSSSKPVKMT  
NLQQHQLDSSMTEHSFDDSHNNMHTIPVVLQHTQPKIDNKVLYHRYQKMRKALDAKRNROKKLTVLREYA  
QDPLTSNDESPTKPKSIDKSSEQIPLLSNVSKCHNANEDEMGLDNLVNTDNIITLPMKPADEGEQNYR  
LLLIISSPNKKKGETCMQKYGQRKRVTGDPNLVSSYRRKSLQONTVPLEPGGSSRSKRRRPPASRRRAR  
QRATRHTQIKAAASHTEATASQVEATAPPVTDNVSVKSRMSANQAAA EARSSGWAMHQDKAHNYLTAQD  
LFSGAMHLP SRKSSSCQAPSNTPEQNPGFQIIDMDDNNVGHENATTSPTEDTDLAYAALRNETS

>ci0100130017

MKIVLLVVLCLTEAFAAGIVERRTGSPCCQGEQSELSCSKIYTHPESWRCTCSSTRNLTEITIAQAVN  
LDLANVLVNDVLACVTHVATLGIQNGGQGSSELRMLRITGNVGIITHPLILRSSVEFPALNSLETLEMDQNN  
ITRLREDTFQSNLTNLQRLSLDGNQISEISKCTFVGMPELKEILSRNRINLVHSETFSALSRLRTLDTL  
GNQIQKVDSTFTAGLYSLNKLQLDYNNIIDVDFSKILTCNQTRITENCTQEVLCCKVDSWPLKLLKMLMS  
NNAINSTSSLKLSAAKAVTELDIRSNKIGNFSFDQFTTLCKLRLNVSYNSITVIEARLNASAEKCRKLE  
VSFAGNRIHNLSDIRMFEGLSRLSRLDLSDNRISSFDSFKLAGLETNLLESNLETFSMPWFLSLLG  
NNRGIIRLGDNPLKCDKNLVELFEQASCNEVSDREMYSSASSVAQLNTLSQVFDNETLTLPLPGVCTVIG  
HGKCKPRITTSMNKCLLRAYLDLASESSAAQNVNIFDKLLGEIEQLYIYARAYVRKQGLSELKNARIQLV  
QAVESISERVVMNIGRLTGNVNDVVVGLMEISRRRTRLPTELGFHIDNSGTGNFLSDHGASPIDQRT  
TRTGVTTEYCKVRDNI PNIRERNNQFLFLESVNSSMRNINRYRCSFWNF TTLSWRSEGCEVANI SSSVDE  
RGYSTITCHCNHLTNFAVLLNHDTRNPTVEDNEITELISYAGIIASIIGLSITIIIFRLSRREFRRGVPQ  
IILLHLFCCLLIVYIMMLIYDKSFVVQHMGSCFLVGFVLMHYFLLSSWGWCLEGVSMYLLLQVYVNVNLR  
RFLTATKATICYGAASLLVCGSLILSGSSADVAEHPGYIVL DAYRYGDACVVVTPNSLYFVIIPIAVACSL  
NLVCFVVFVIKGLRQTAAX

>ci0100130791

MKASAVFKTLVCCLCFKVCQLAAPEQGIYKRTLTKTDNSLYIVKTLYRDSIVKVAIVGKDKKCASTEAIE  
VFWQVRSSSCFGAFSAPSSEWQSTFINHITYTPQYQSENVRGEYVLNYVINGNQHTTDDKIYCDKNNILH  
CHNDWKNITVEPTTKPPTTEAKPDEKKNQTKREVGDPPAVNEPSESSDTEVVAVVPERSYYLFYLF TTN  
IHSDDAYEVTIELKSPVGYLSAHEYPLLTIFYMCMCIAYIIYALLWLVMCACNYRDLLRVQFWIGGVILLG  
MIEKAVFYSEFLSVDQTGISVIGAAKFAEIVSALKRTLARMLVIVSLGFGIVKPRLGPMHLRIIVVGG  
YFVLAVVEAMIRNDSLHDPNNRAVILAFIPLAILDVAVICWVWFMSLLQTMKTLRLRRNTTKLSLYRHS  
NAIIFCVLASIIMI IWSWRVHVSRCMVDPQLWMETAFWHLFSVILFVIMILWRPTANNQRYAYSPMVD  
GNDSDEDEEPMLSGGARETVKMRGGKFKERSGGDKTEEDLKWIEENIPQTIADVALPMLLESDEDEEITTK  
YEMSKME

>ci0100130090

SQFCRPAIVFTMVVDSVLAIVVVTNFLVLAVSVRTTIMQNI PGYFKISLAIADIMVGLFVLPGSVYHHY  
VLSMSPLPFRSEGQSPHATDYFDQRYLNFMGVFTVMSFSVSIYTMGAASVDRYLAITKPFYRQ GKYLTK  
KRSIIVFMAIWAFFGICAIYPVFTKRPYDISGLSLILSTGLIAAVIYAVTMGLPLLAVVWINGMMLRQVC  
TDGKNRRTLSAKRRRNQQQARPDTAEGERPENQSGKANVTHSNGAQFVASRLLLSNSFWNCIIYSVRNH  
VEVHPWEDILRPRTDTAKLTDNRNLCQKQVQTVHTPLRKRNGVEVLTYGTLVQARLKT VGSQITAVK

>ci0100130111

GNAISNRQDELHCCNETFNSFSKNWHNEADYLTETLQSLKDWSCPQYNAECSKPTFNFNDFTALVYHRSC  
NRTLFEESRQDEL RDPCIQVALYDAAVQERGGYGYHEMCRVFI PFCKFIWCGLDAENIHDHSISAWLCIP  
TFCRTNIIISIVVCSILSIWNVVANSIVLVVFFKQKRYTSSAGIYKLSIALADIMVGXMYLTITIFTLMV  
ACIDRLVYVRNSRTYSNQRSTFVAKIAIATSWVVAIIVAIVPPFFVDRYNLIASVMVLSSGATS LYLYIIG  
YVIPLVVLWVGIVLLILTIIRSRIATEAQTEQEAQTRTMQIMMGVFSLNLLIIGLLSAGGSFFLDNIDH

ASPTTLDQNAASTFSSFEFVAILFIVSNLWNFFVHLGQDARFKSALTSCACSAATPGVLSVSPSSSFG  
MKGNTNLGYTNSSMVGSDVMSSDSAVDK

>ci0100130259

MDVNSTNSSLTAIADFRYIGIVIGIVDIILGTLGNILTIVVFSRISNLQSLFNIFIINLAIIDFLTAAFM  
MPLNVAGYVQMNWPIGGPDSVSASVQAYVYFCCGYTSITCFMLITVNRFI SVMFPKHYKSLFSRCGILVG  
LVSSWLIAPAFLLPVLLGSADGLPIIGWNQKQFLCTFIRVTGKWRTYMQVMITSNITWLNSCVNPFIYV  
ILNPDFRMEYRIILKYLWLKITCKL

>ci0100130320

MLRFTKKSIGKQQPQGFQSNKQGFIFTHTIILICLSFAKSAEARNTTTTATNRQLYLTNFTTQGLPNVSEL  
FPNIENETNGSNIAYKVGLSILLGSICTVTVLGNLIVIFTAILFRQLRTIPNMFIIISLASADLLMGTIVL  
PMWVSHYVIGDFKWSLGFVWCDVWTSIDVLSVTASIGTLCAISLDRFVAITMPFKYATKMTRPRARFIIGF  
IWMVSGTIAFVPIINLWKKTNKPEDLECYDSPTCCEFRPNVIYAVVSSCISFYIPLIIMICAYSVVFKSK  
AMFAFWRPDYLSVKIFAIQKRGVLPWEKREHRAVITMGIIMGTFVVCWLPFFIVNIAQVFCQCVASTPFL  
MVNCLGYTNSLFPNPIIYCRSEEFKAFKRVLMCGLCREGKTTCIHVMIPLHIVGETSTSVNGFVTDELY  
PQENTLLHMNGRNRSRPSSGYMELTPDV

>ci0100130340

MLPQTVILPFIILALRFCKGSWTEPVSYKHPGNITIIAGLFPPLHYISDRPDNYSLEEPEALVCRRYNFLGF  
RWMQAMIFAIQEIINNRSDILPNIISLWQLFDTCNTHARAVTQALHVQNKLYPENLPLPGLHTGLSALIGP  
TASDKSIVVSNILSVFDVPQISYGSTSRLLSNKNIYNSFLRTIPNDDEQATAMVELLLHHNWTWVGAVAG  
DDDYGRPGISRFKEEAKEKHGICVEYTAYVSESMSEEHLKQTAREIKNYNATVVFVTFISATHLVPLARYLS  
EYSVTDKVIASEAWATSDTVRAIDVFQGTGLIATRGGEMPGFRAFLEGVSPKTQPESPYITEFWEKSFQ  
CNCPTVCAKTENDGGMSSHNSYAENCTGNESTLGDGAITSAYLGWTDLEKSYTTYLAVYVVASALHNIS  
TCVEGKGLLKNACPYLNNLTWQLLSYIKKVDFPPGHDKYTHNDTVSSVMNGDPNASYKLVSWIPKMN  
CRGNITVDFVHVGNYSSMVTPKWSINESAIYWHKHNDIPKSVCNADCQPGYYKIQLQSACCFKCAECP  
EYSVDINSPVCTPCNLTHRADDNRTSCIPKNEEYIRWSDAFGVTFCVLSGIGILLTFTAGSFMKMRRT  
LVKATNRELSFLLFLSIFCCFLTPLLYLGGKQDWNCKGRTVTFSLSFTFCIAAILVKTLRVLTAFEARIP  
VYKKRKTCLLGEHVQVFFVMVSVLVQVILSVTWLVVDPKVMLSQSKVWAHTSDISLIVECNVGNLVMG  
FVYGYLCLLALTAFAFRARLKPENFNEAKFITFSMLIFFIVWLSFIPAYLSTTGINATAVSCIAILSS  
TFALLACIFFPKLYVIYWTPQRNTVEEVQRNTATHAIRSSRSVAYSVRIRKPPDMSSSDSNKSMVQETSP  
SNFYLLFYMYGRNANDRNPFKDFDNSFNNSNNINLSSVSKASNRRLLKIQRNRSHSLQPERLRMNLNN  
QDIYEDVLTTFKSKDINRFSGQSEKDSVQSESSSTSKLNMNTVTCADDTESTTFNVDIAGKISTDTAI  
TDRAENYEKILFDDGKRINLKVAVKVNIIQQTACDKNAPSQVLNNNNNHTPLETILPTSEQLANRPLSEC  
NTGAELSVQSSRDDITTTNNMFDSSA

>ci0100130574

MTDNWDDDDFGTFESADLNKGSAPSSATVNTSTNLPAWLLEAQAKPPI SPTHQRDEPNHTAKASNYEQLS  
LPTSVASIFDSTNTSVTSEEATGDTGHDTVSATIASPAVTEYAFNAVFSDATSAHSTLSTEEKGSVVFVK  
EKEKKAEEQKKESDLVVQLRGLDSAMALKEQSEMSLNEELREELNHKVEELNKKIKRKEEHSIMMQLE  
EKKSKELEQLQSSSENTMREVTEQYTTLCNQVAADQKLQFEKHLEITEKCCTMLNQNDLMTQQMTKQQ  
SIFDEKLSSAMNQCKDDL DLLVEEKIKMVEDRCSALEAAKIIISQVQIEEDFERERSFNAKSKRDLVAEL  
TLKHKEELRASVEEERVRGNVIKRAIEETKKSILRISREEQQEIELTRERHLNAIGILLTSSQEHLRHL  
RDDVTSNPNATKHIGNMSAKQTRLFPDVLSGNSINVSTLPFAENESCVPLKEPFIHAVSAVPALVVIEN  
LVILLALVLYRSRLKHSNVYRYVASTLVANLVTSALGFYHF INYYYYGIESAHPNHWWAFRKGMTLALS  
LCGNIGLMIYGIEDSTYIVGRVSMQTSEQSTRLDPKFRRRKANALICVWVALPTIYGLLAMTDWNCTNLC  
SCTLSYKSGKYLCPVGRCSHIYTPMSKSYLLVVVILWALECIGLLFLLCRSFCNIRGRGDGSESGGRKIS  
IRKALGKYHASHHTVTILFIFLVVCTAPIMGLFFADFIQDAHFHFLVNCITPLPLVYCVVSPILITQK  
LSGVRALLMVMTFVSWLKPQSNTPGPKNGEKKTPQTPDSTNPTTH

>ci0100130612

YSECDGFNDCGDWSDEKDCIEWICGANDYVCDYCSNGNCDLTGIYYFWPCYDRSYKCDTDNDCGDWSDEK  
CNYQCGSNELACDYLESISTCYSKEQQCKNMGKCSDFSDKNCTCEANQLKCGCILKPDNCTSAALG  
HEVLNGLTDCADYSDEAYGSDNCFVDGKLCFRCLDGRMLISAKQVCDGVIDCYDLSDECLCQDQSVCDN  
VLGKSRQSCLPNEMICNGVCMEIDNVICNKMVDCNDTFNNMYCMLMMHRDEEIEYKFCPQDAEESA  
ASVCDGLPECFDRSDECNVGCPSETHFCLSSLDCHTKLVNAESSLRIESYCDGRPFISPGCEPGFDEKNC  
TGRFYCKNTSSLVWSVEQVKVCDGVLDVCDGSDDEVVELCKNTRFYCLNKQPLSVDKSRVENGFKDCSDGS  
DEEMIGTVFIRILMWIMGILSLIGNLVFLFTVIEVVRKKNPLKTSFLWFVINLSLSDFLMGVYLVVAIS  
SKGAEYSGRYCYHDAEWRSSNLC SGLGSLTIISSEVSALTMAMVATFRLISVYKPFKMANVKRVAYMAPT  
FTIWA VGILLGTIPLIQTSSAEFGYYGETSVCMPKVFVTVGEAVWEYS AFLISLNFCLFLYVAVYIGVF

KRSTKMKNNAQTSNKLQKTISLLILTTFCCWIPICIMAFLSLSGVKLDRIYVVISAGVLLPINSVINPII  
YSDIGRIAVKKFIKNFRKPVVSTPRMENVIPSPNTNRITTTISL

>ci0100130776

MVQGENITDESIVNGVNQLEVIASGPDLSGDTKEKFVEFFKTI SDLAAEGKAKIFDHEGSSSVSYSPVV  
KGVNGNNSQPAKISIPNEALVQTL SKGLARKKRSTENATFRLSLAMYNDASLFPNTDNVSNVCIVSSFSC  
KKQLLYSSWCKYWDFTTSKWADDGCCLNETANPTQCLCNHLTNFALLTSVQGPTDVVLSVIVSDVGCILS  
IIGLFVTILVHALHRYLKT LWNILLNICSNLLIAYFIFVVGVSQTSNRTGCKVVAVLLHYFFLTTWCWMS  
VYSYDMYMSLVKVFVRGSESKLLQRMAAFAYITPAAIIVIITAGVAMDPTLSSSYIADHMCWLTGGSLYFGF  
LLPVAAMLMYNFFILALKVKDGTGWFRRLLHRNQSVPGAMLGSVTMTSLMGVTWVFGYLLVISTDVIYVTVF  
SWLFALSNTLQ

>ci0100130804

SAAEPLKTTDIHNIIVPTVRSFSKGLDKYSFISFAEISSTGSDYVTSLLRVFEEETAPEIRDNVAHLVFP  
HSENGLSSSSDNAVYETWGNKIRPQQLKQLQRVSRNLSILKLDKLDSTEFYLDYESSRHHVYQHVMVVMV  
PVADPPQQLNVFVNVLLDTYLRHHQHLDVNVQVKIFVVCDEETLLYPFENSTNVTFPATQAGFTAI SNNKC  
PNIWNDVRDSPINTPEQRQOVANDLEVITSVSADLTTTDTVTQTSEALTEIVNTTTLTPEVRENMNVTCF  
ILAWQENDSCYNMSVLFHTPRANLLVNVFFCISDNLENPLVTTTLKLLLSVLPKDTYTHNGI IHTYLHL  
LWFRILATLDSVGEKVEVDEGEYEYEVSGSVAIAVVQPTQDRRISFVAFPPDDKLFRSNNSSTFTMFNNV  
TVNSDAVLSATVVNANGPLNNDPPVELGFGTTTIVTTNIVSSAFKLMQNSQELCFFCQVVKILLIR  
SGRYCIILFVSLQGLIAGRSVCVYWDEVTLTWSDVGSVITNSSNTTLTCTFNHLTNFATL FVNDSISNS  
HVL DILT VVGCSI SGASCLLLILIFIFVPKTRLKGRKKGAILLANLATAILLLDIFLIVSEQEIVTSSMT  
SCLAVSVLTYFSMMSVFTWMMVEGFSIASII IYLFGNWFMIASCLWGWLLPALVIMFTTIFNIDMYKRTD  
GDLTNFSTRCYIQPGLVLYAVLIPAAITLGVNLMYVFLTYKVTCAKRPNFMAGKSKDLQKNLLFSLTLF  
VTLGLTWIFGFV IIPNGDASFAFSVLFVTFVNSLQGFLLFLLYVVRQKFTRSAISEQARRISTYAIPTTR  
TTQ

>ci0100130945

GAWSTKGCEVMSSNHTHTVCSTHLTSFAVLLQVENELSATHQRALSII SKVGCVLSF IGVTLMCAAFIK  
LKFHTENMKIHFNLGLAVGFADLVFLFEEVAESSRTGCVIVTVLLYFNMAVLAWMLIEGVHLYSQVVV  
FVSARRWVKRYMVVWGVPFLFILTVMGILNVKLTGNGICWLSPSDNSIWAFAPALVVILINTVILITV  
IKVIINIQPEKSNHAKVSKLRNAVKGSIFLFPLLGTTWIFGLLSLQNTLLFQYVFATTNSLQGFLLFV  
HCLCNSEVRFVASTLYGMQVREDARRHRWFVTSSTQGLGTRGQRNQPGLVSLNVANGLRRFRNSISFE  
TPTPSTLSNQESETEDSKKAGKLGAILSFFPQMFSSKFPPTIMERREYEETKLTPTGTPASGGSPRSDTR  
DAEKNVPLPGMPVKNDKFITSLSQLSLPKEAQVKLNKLLADHISRTDADSPDVGELGKDEEQKMKMSYD

SGLNSIENESELEDEDGWMMEGSKNVKED

>ci0100130986

MVQISEAWQIVIPVIGVVLFIGLVGNSLVIYVTVTTQRAIKHPVHSMVLVNLAAADLIYLIASAPYQAM  
SNSPISLGVDSFLCPSLHFISVLTMSVGI FTMCALAWMRFMALIVPFRFQGSMMSTRTFGCIVLVVVVI  
SCVVSTPNLVYYRPKPDESGPNQTDRLAGICEWTDGKAADDYAIALFVITYLVPFLLVANFYFFIGREVC  
YLVNRPRRVTKTTIMVLCLNIAFLLCWFP HHLRYMMKVLLIEQVGACMSYMHSCINPVIYTF AAPGFR  
SLESITGRR

>ci0100131120

VILLILSLLVIIGNISVMLVIYHKSRTSQDVYKASIAMADLIVGVFVIPSFAITYEMFNKSYLNAIGFF  
TTTTFIIISIYSLMVASFDRFSIVRKPLAYSKDGAKLLAIRATVILVWLSIILGILPLFIGPSLRYGLVAS  
TLISTSGTASLYFYVVALAFPLIVMVVLSISTFVMTVRHNNRTRKLVASKNKTLSRTEIRMARTLGIMV  
GVFTLSLLPVICVILASLFMYNKLLTNVHLLFYAAAVVRI STASTVLTGNATSTFQATITECLNVRGQVI  
TNRKFELQCCQLFSNRYKLYWFREGNYL TEALET LKTWRCEPEFEEDCTQRIYGFTEFTQRVYDRACNRTL  
FESACLPTVFRVLS DAGVNVTDQNWRHALRNQLEMHALQYPCIQVALYDAVSAARQSSYGFYHETVHLH  
TPFCHFVWVGFDAETTVQHSIFPWLFLRTE

>ci0100131137

FFIIISYDEKIMVCSWDDTYRSFTIFITVGAIVLPVIVIALCYWKLWVRSLSMGNSAFQSNEQHRRSVR  
KERNLLQTLATTVAFFCVCWLPYGLCVLIDPVGVPPLAKKIQKEVYTNHPYTEFWQQISNTVEQPRCYYS  
YSKAKLGCMSFNLTTEFSPTQLSNVTEGTKLNAEIGAVQVVELIYLTILCVLGSVGNLVVIFISITLENR  
VHSHGNIFVINLAIADLLVIQVTGFVVPTVMINVIQSANALPPIACTIVGYTVTVTCTCSLSNLTVIAIN  
RFWAVVRSKTYTQNFTRKRVYLMMIATWVWSNLLSMPSLIGWGRIG

>ci0100131140

NFVGVRRLSRSGGGGEVEYHGGGSGNGQSDYAKKHKFSFPLREIAGKRSQKDSNGYSETEPAKTENESRT  
NQTECTRVLLESRKETHECMRIALHSCVQNDQPCFWLNVWRACSKLDNVVDVCNNYLQFALSALSRIK  
TVFIFFTLLLLLLLLLAPNHAQETGDSNSLDDVTSNDVAGNGLDFGIGDDVASDVGDLKTNDDDFDYDLGLG  
EESDKMGSLLIGNDPNIFADIXITLAIYAIITFVGLIANGVFFVIFAGREIGKTVTAMYVVQLAIADS  
ALLLTLPIFGLQKVAMNWSFGAFTCTLCHSIKFLSYAGIFFLTAMSVDRYVAVAYSTKSHQLRTRRRMT  
IVCLVVWLAAGCMTIPILIFLFGNNSHEYTCSHKHQKKVYKTWLVVDFVVGFLPFIVITISYVMIVKR  
LQTSSEKIANMTGKRTISMRKRVTRMVAVLVVCVFWCWLPNHLFTLAKIRGLDLSVTPCYGIEHFLVAFS  
FSNAAINPILYSFLSHNFTTRFRDSVAMARRRMGRKGSMTGVHQGGTHSGDHQVRSFLFKTEHLTIKI  
TH

>ci0100131143

TDKRQQTAAHQCNNLYWIHDNIISSKCYCELATFRNKVLRADFVRVHMAASNMAWFNNSINPIIYVLLNR  
RFRKEYKRLVLMFFGRVRSFMDLSLSTTPQKHKVGINVSMQPSAMPTLQVARAVFQFLPLVIMVVL  
YSIIFTRLDRQREIHATMRKGRSASNATGINSVSVSEASPTKSKRSVSVKDKNNLRKSIMLRKTSSAD  
MSNAKMDAGLGTMAATVVSTVAQLNVTQLNATQPDIDYLRASSFRYFGICVAIWAIFVGSIGNLLTIL  
AFFSNSKLRRTTFNVFIVNLSIVDFLTASLMLPFNLAGYAIWTLRFYSEISSLQLFLLRLYVRCISSYYR  
QSIHWRCKAGKV

>ci0100131249

MSVNARNYVKGDVHTVSVVRFSLLRGPTRKNAKLYRPPVCAFLVPNSQEEEDWTYGCCTAIQDKDYVTTT  
ECNHTTHFAILMKAFGDELPEPFNKSLVLSMILSAISIALSVTILIFITYRRVLLKDRMLIHFLIIA  
LLGGYVSLLVGSAFATHNEQPTIPCIISAMVSHYFFLVFVWMSLVEGVLYFYKIIILVFHKKSIECLQRF  
PLVGLWTPALVVIVAFIVSRTTCCDDYSVEKNSTYIDQYANATTCFLTSHNGMIWSFLGPVLFIIALNMVV  
LVRVSMVIYTSAYTSTRLSAIGNSCRISNSLKRSSRGALILMPLIGIPWIVGLLANLYANNSNVGMVGT  
FGSYLQVLLVGGQGIIVFVFCYFNSEVRGAYMLAAKRRKSEDSLDAARRKKNRASSDVQRAGIYMSMER  
LSVSTLNLNLRSTNGSIRDKQSYKIGAEKATTFMMLWPSWRNRKPVNFGEVDAVINAFNTLTSIKI  
SDVHKFLDNANVLLDSTKKIASYQFYEGMGNDSSGKLIIEKTAKGISNLLIQWKSIIQKIKQKDEVESE  
RTSMVEKPTTNEHVRLTMFDTMESITQSIKRLPPDNGSELLIKASESQVDVQVTLSTNPTSLVNQTH  
SELSRTNNVTVIMYPATNSSTNDIRSFVIVSVFYDFPWSSDTDYRVMVFFHRTPFICFS

>ci0100131416

IPGSPTLAMTSQRNLSAAPSIVHLIDCKKCSSETDPSRHNTTEPTNIEEPTPKSNEIANLIAKERSGII  
SEPVTPTKGDNLGVKVEIKYLQVGKKRINKKEKEVAPSPTLHSNENSHCQPTKSNLRLKRQYTAMQL  
EERKRKSLDRKLLRMSVAICIVFMILFLPSVAINLAQVKDPRVHMFASVITWLNLCVNPVYCFINKRMR  
LQYKNLLKFWGRVCVCIGKESTHSAHRRTRYRSRSSHSESQKSSTRNRIMGEFENTTDYIVTSAINF  
VATTSEVDVSAMRLLGIVIGIIDIFAGTSGNLLTLLAIYNNKRLQTTFHIFIANLCVIDLLTASTMPPFN  
VTSYIKQEWPFENDFTCSFMAFSYYCCGYTSIVCLITITVNRVYVGVCHPKHSNRLYTRNRTVVVIIISW  
FAPVVLSPFFLPGEQGRGFVQRLTLCVFKITAKWQHYYMEVNVHFCSLVNSVKWLYSFY

>ci0100131489

MSDLHSHNRGSYKATSHSTLPTTDHMSGSGGGIDDFERPRSFRTQEQNVVMSPLSDTKPVPTKRN  
YRVDVRPPTGGRTNPSLVLNEEDVVRGRYMDNTTVRGCNLIKEDFTNLCDLDALWGIIVTGLAALGLV  
LTFVFTVVSFVNLKRYVRHQRHRYSTLLYFVLLGVFLLFAFSIAFVVKPSVIVCYLRRIGFGMAGVVVA  
PLFVGITRTWRMSYLDLRCGLLAVSAACLMLVEAIIAENWILKQPVLANGRCEVQDRDLVYSASNGF  
ILILFFLSTLVACCKRDHRLSGFVIVSCLVTSIVLILLSAAWAAML CYGNEKLGHATDWSPTTAMFMVK  
HGKYDFTKKNKQKTYKNAYIYYNVSQCKNTK

>ci0100131543

MASSGSQFWILVCLVRSNAVMVTSKNNKAVVLCITVLLLPYLLSVGLYFVSHSAVSYLFIVFVWVPT  
VCFIFMSFRKTHKPNKFVNQSPASRNSILRRVRMSSQFFFTPRYRFRTWTSEAFYVVSIAVDCVIIGNE  
KLPFWSCFVVMILSVMSLVGNSFVVGIIYRSRRMFRLVNFCLCFLAINNLVGSATSLVSSII

>ci0100131580 (JGI model)

RLYQLECAKYNQNTEDWDKDCFEFPGVGTTPSRCQCDKSKYNPEVYFLVNTFQKEVYFPSAKVLSIVSKI  
GLWISLFGVFLTFVIYISIKQLRNRQPTIFILNICVCLFIVYITFLFGIQATETKTTCDASAMILHYALL  
AFWFWCGANTLNLYKLVKLVFGSPDTLTPCVLYSTCYGLPLLVGINAGATIFTTDLSPEDDSNYRHS  
KCWL RHYSLYFGFLLPMGLIILFNVVVFLVVISKLTCKRDKIRSSKSQKNSAKEGLSLAVTLCFMMGFAW  
IFGYFLLIDGDLKLEIEMSWLFTLNFAGQVTLFIMELPPDELENEIILDTMSVKVRCVSYVFIWKRPHDT  
VYKELTEDKQNTCQMWRMYVTQFVIVSGNNSYGGKQVQLINNDIKVTPMQPVPSKPVQVSNPLLNKSC  
NTDIDDCAPSPCSYNSTCVDLINGYYCICPPGLNGTNCINIDDCSPGICNNGDCIDQVNNYTCSCFDGY  
TGDKCLIDIDECATDPCVNGTCVNLVNAYMCNCTAGFDGTNCNSNDINDCAPNCPVHGSCTDRVENYTCAC  
DTGFTGRNCSIDINDCPNCPDCSGNCTDLLNDYNCTCPAGFSGKNCSIDINECTPGVCGNGTCDVMDLQ

YYCNCIDIGFNGTNTCTNNIDDCAINHCANGGTCVDGVANYTCQCVPGYTGYNCSTDINDCDPNPCDSCGNC  
TDLLNDYNTCPAGFSGKNCSIDINECTPGVCGNGTCVDKLNQYCDLGFNGTNCNIDDCAINHCA  
NGGTCVDGVANYTCQCAPGHTGYNC SIDINACKPSPCVNGSCLINKNNYTCECEAGFTGMNCSIGNNILI  
VYFCYSFFLMPHVFLMCSWCSLLTFPNVFLQSTDIDDCPNPCVNGSCTDQVNNYTCSCDPTFKGRNCSQ  
DINSCTPNPCMNKCSVDKNNYTCECEAGFTGRNCSIDIDDCSPNPCVNSMDCIDRVNDYQCDCTPGFVG  
KNCEKSYDDCHNVSCNSFECVDGFLSYTCNCKNGYSKNCNE

>ci0100131580 (proposed model with corrected alignment)

CNTDIDDCAPSPCSYNSTCVDLINGYYCICPPGLNGTNCInIDDCSPGICNNGDCIDQ  
VNNYTCSCFDGYTGDKCLIDIDECATDPCVNGTCVNLVNAYMCNCTAGFDGTNCSNDIN  
DCAPNCPVHSGSIDRVENYTCACDTGFTGRNCSIDINDCDPNPCDSCGNTDILLNDYNT  
CPAGFSGKNCSIDINECTPGVCGNGTCVDMLQGYCNCIDIGFNGTNTCTNnIDDCAINHCA  
NGGTCVDGVANYTCQCVPGYTGYNCSTDINDCDPNPCDSCGNTDILLNDYNTCPAGFSG  
KNCSIDINECTPGVCGNGTCVDKLNQYCDLGFNGTNCNnIDDCAINHCANGGTCVD  
GVANYTCQCAPGHTGYNC SIDINACKPSPCVNGSCLINKNNYTCECEAGFTGMNCSIGNN  
ILIVYFCYSFFLMPHVFLMCSWCSLLTFPNVfLQSTDIDDCPNPCVNGSCTDQVNNYT  
SCDPTFKGRNCSQDINSCTPNPCMNKCSVDKNNYTCECEAGFTGRNCSIDIDDCSPNPC  
VNSMDCIDRVNDYQCDCTPGFVGKNCEKSYDDCHNVSCNSFECVDGFLSYTCNCKNGYSG  
KNCEIMELPPDELENEIILD TMSVKVRC SYVFI LWKRPHD TVYKELTEDKQNTCQMWRMY  
VTQFVI SGNNNSYgGKVQLINNDIKVTPMQPVP SKPQVSFNNPLLNLSRLYQLECAKYN  
QNTEDWDKKDCEFEFGVGTTPSRCQCD SKYNPEVYFLVNTFQKEVYFPSAKVLSIVSKIG  
LWISLFGVFLTFVIYISIKQLRNRQPTIFILNICVCLFIVYITFLFGI QATETKTTCDAS  
AMILHYALLAFWFWCGANTLNLYKLI VKVFGSPDTLTPCVLYSTCYGLPLLIVGINAGAT  
IFTTDL SPLPEEDSNYRHS AKCWL RHYSLYFGFLPMGLIILFNVVVFLVLSKLTCKRDK  
IRSSKSQKNSAKEGLSLAVTLCFMMGFAWIFGYFLLIDGDLKLI EVMSWLF TLFNAGQVT  
LF

>ci0100131605

RGCHVVNVNTSNKTVTACNHTTNFAILLQVVPKLTATDTATLQLISYIGESLSVFCLIIITLTTFTA  
HSLKSERMVAHFHLVLSILFHVQLFSAKAEQYKDTTAVPCIIVAFATHFSLLVTFMWMLCEGITLHLN  
VVNVFHAMTKFKLARYFIGWDYPKMVVFATYRGYHFIEWCWLSTDNYLVWALVIPALLVLTVTVMKLSDN  
INNLIKIYFLHFPFRKSLKGAFLVMPILGIPWVFGFIPQSLTHVALLYIFTVLNSTQGIFILLFYCILNT  
EVRTVVVRCLRKQNL LHRKQKSWASQSNYRHSVDLRQINRNDNSDFDQQMGVERSVSVHTSSTYCGGVAP  
SSGDSL TGSFQEQT SFLPQT TVKHLFVDSYARKWPRSTVARCPEDACTLIRSSSLRCVETDNVNNGEPTQ  
CRKTWHSSNFQNF SVLRYCDEKDKIKKIICLLNPNTYIEAHYKIPFISTFFTEPDPVVSNNVSAEDILG  
ITDGEVNYIDADDASAKLGEIADTLRDTKGNLNLGVLINSVEALKPVNYSAVSSTGIKRLITNFVTIMD  
DMVDEGRADEWKEIKEEENGPESSQPEFATTTIPPQKQSDPHSLLFITENVLQRFVMDSTATLWSKFDQ  
GLTVTTNNVISVIEKPI SNASNTSTQDTPTLTKVNLNVDPDVASDESTVVISLFPRIINLISEFAKLTN  
CIYLQFVPSAPVLSATVLQKGITNSAVHFIVPYNASDIPDAKKSDEKYYFNCMYLTLNNDWDTR

>ci0100131681

QTERRTFLMLLAVVMLFVVSWMPLHTCFHCNQRFI SDTSTDTVRLIVNWLALSNSMMNPILYAFLNRSFR  
TGFRHVIIVMLNLMLVGIIGNIFVIASVKREKQLNIPGNFFIVNLAFADLIITGISMPIILHNVL PASM  
IGYEQNIFCQASAYLKI IALHVSWYSFAFIAINRYYSVCRPIQYYPYHFKRDRIMKTIWLIWLWVFIINF  
VMVGWAVPIVYDNSTNDCVLGIQNNGGYLFANGIFVVALPLLTIAFCYSLVFMAI IKNRRR

>ci0100131721

MGLTLLLMP IIPCVLYAKIYCFVRRSSEKLPVYTPPLVANNGGTEDNSRILPIHKTETCNHLLVRPKIS  
QSIIQYEANGNVSCRKTDDSWQGDGVRPPSNRIGLKGWNRIREGSWRRKAMVTRIFTKNSNDIKEEVPQ  
EKRKISSASKAKSAARRRRYRDMRLRLRTLVIILVFLVSTVPLGLLFFVVSYTEQDKRYVGTAKVLLTTS  
LNSLVNPWIYFWRFP MRTAMKKVFCRACAFKGS PSHKNDKRYTGDGAMGVHRRVAGGV SFDTNSRAGR  
GSKPENSMGKENTSSISSNALMSNALGGRI FTEGSDAIGKNRFCLKSFTANFSRYGSSQGTNNSVIQDS  
ILSNYIITPCQQDKAGAGSFEVVATVAGAGIGITNIVVIAAILWGGRKLHKATFFCICNLAVADMLAGFL  
LLWIFGLQKILLPFRTPQSELVQKSIWMTMTVWSSMLSQLVIAIDRYCYVTKGSPGDGGISRSTRKSDI  
NRKRKR

>ci0100131758 (JGI model)

DLIRNPILQIIVWLVAVISLGGNSIVIIGTSRELWRDRQVEKLGRLAKCNRTFVLNLAVADFMGLYLLM  
LGIATAVKS DRYCSSDRTWRTSHLCSIMGIMAQFSSQTSVLLLVLMTSYRLYGTLRPFQVEESKLLGGAA

FLTGCSWMLSFMFLSFLPQVRLFSVVFHACYYNKYPLCQPFYFYNLGETGWEYMTSIIIVLNFAFVYIAYAY  
VVIYRASSRPNVRKSVRRRSRQWRRDNRKMQKKVMLLVATDMACWLPICIIIFLLRMSGVQVHVDVHGITG  
TVLLPINSAMNPIIYSVCDGIIDCLDLSDECLCLSNHENRQTRNPICEQLTIRHPSDIPVSEVFIFKKG  
SNATATSCDGEATCEDFSDECDAGCWDPPEYCGVIKNGRFQCTEDTNSRFQNSSIGHALDPSLVCNNVID  
CPLSNADETNCSTSSHYYCWSK

>ci0100131758 (proposed model with corrected alignment)

vcdgiidclldsde clclsnhenr pqtrnpiceq ltirhpsdip vvsevfifkg snatatscdg  
eatcedfsde cdagcwdppe ycgvikngrf qctedtnsrf qnssighald pslvcnnvidcpls  
nadetn cstsshyycw skDLIRNPILQIIIVWLVAVISLGGNSIVIIGTSRELWRDRQVEKLGRLAKCN  
RTFVNLAVADFMMLGLYLLMLGIATAVKSDRYCSSDRTWRTSHLCSIMGIMAQFSSQTSVLLLVLMTSYR  
LYGTLRPFQVEESKLLGGAAFLTGCSWMLSFMFLSFLPQVRLFSVVFHACYYNKYPLCQPFYFYNLGETGWE  
YMTSIIIVLNFAFVYIAYAYVVIYRASSRPNVRKSVRRRSRQWRRDNRKMQKKVMLLVATDMACWLPICII  
IFLLRMSGVQVHVDVHGITGTVLLPINSAMNPIIYS

>ci0100131828

MGLLVLPVAHNILNGIKYQQSDYKQLMLYSEHTTVEGAIFGIVGIISSTTTTVFGFLFLTIDSYLSVRWP  
VKYRVGDIMTTPRALFLVAFIWIIGLAVSALPILAKDFLEYRLVYFTFMYPYLPKPIPVSMPPSAIPPG  
YLQINIRVGDQSTEVTTTQPVNPNRNQIIIVETPYDPTSGAGDVTSTSDPKTITIPYILNPNSQCGVFPAC  
SIGLRINEKSELTAVTCHKPVVGLLVAIVIIISIVIVLSNVLIIIVTMRTRSLRKPFGYFKVSLAVSGKH  
SICLKNIMTEIFYNIVGLAAALLFEDFYS

>ci0100132083

GNIFIINLAVADIFVTGFFLPTVLANVIYTGNSLNKPACDVAGYVITLTCVCSVSNLTVIAINRYWAVVK  
NKTYAKMFSKR RVYIMVLLVWVWSNLLVIPTLFGXILCSIRYDEKMMECAWDDMKNSYNIFLVVCAILL  
PVGIVIVFCYYNLYNRGAWARSATSVGSRSNDRQRSLQRETNLLKTLAMTVVLFVVCWTPYGFVVVDFDP  
GVAPTTKKIVAWMGLSNSVVFIIYGTMNPFVFRKGYKHLII

>ci0100132112

SRGRRRRRGTSDYVYFQVPNRSVRI SENLPAGSPVTTMAYARNEVATQNVVYRLEPRQNRHSLELFRID  
PHTGVITTNSSLDREDMSIHFFNVFAVRPDINQARGTLKVYVIDVNDNSPIFERPSGYNVAIRENQAI RT  
QIQTVKADDADSGKNGELTYSIVRSVPHTNAFAITQEGNLIVNGLIDREAHSQYLLTIAARDQGPSRNS  
TVPVTVTIEDVNDNHPQFTRAQYNVRVYENARVNSIIANISATDADSGMNGLVSYVLYSGRRTFRINPQT  
GEISLIARLDYEVTKRYQLRVRATDNGRPALSNTSGLVNVQVLDINDNTPHFISSPYNKVVLESAPVGSK  
ILQVEAEDGDALRSSRIAYTILNRGSPVPFRIDLQNGTIQLSQKLDHERQGSYFTTVQASDHGSPRRTA  
TTQVTINVRDVNDNAPYFTSNSYQKVAEDMALKSPIINIEARDPDTDATISISYRIIAGNQDRKFSIIS  
RNGIGKISLAKALDYNEQRHYRLTVEASDGLKNTTFVYINVTDTNSHTPIFEPNYYPVTLPENVPIGHL  
VVQVHAVDGDIGDNARITYCFSDAVSNFQINSNNGEIRTRQKLDLDFNLKIMLGV IARDNGIPPEEDRAV  
VEISLTDINDNAPVFQQTQYQGEVSEDSRVSQRVLTIHATDRDSSNNGEIRYTFEGGNGNGYFVSDPHS  
GDIRTALPLDREHIDKYDLVAFVAVDQGTPKLSSVAITINILDVDDNPPTFKNDTLYFKVSVKEDVDIGH  
VVARIKATDPDQTTSDIYDIGHDPEVLRYWKLNPDTGELATVDVLDYERKRYTFIVSALSNELVSQAT  
VHILVQDCNDNNPVLSDFEIVFNRYRTRLSDFSFPVGVIGVPAVDVSDTLTYRFLSGNDGKLLLLQH  
TGEI GLNKTALDSNRQFSTRMREIVSDGLHRTPAWCTLRVTGITDEMLSHSITVRVLHMNAYSFLSPLMY  
SFIDGLANILNTTSKNVVFVNVQNDTDVKHEILNVFSFAKKERGEFFTSKYLQDQVYLNQRQRLSELTRN  
VLPFDDNICLREPCQNYKRCSSVLTDFDSTAPFVSSRLMIFRPIYPVYKLCCECPIGFTNDIKCADEINMC  
YSSPCVNNGKCLSREGGFTCICREGFAGERCEINMKQGRCIDYIGVCRNGGQCVDGPGSDEFHCVCAHPN  
HSTATCELRSREFNHGSFLMMQGITNQWHFTLSISFSTTQENGLLFYNGRLNHEHDFIVLELVNGQVQLN  
FSTGQNWVDPFVDDGLNDGTWHTAKVEYYNERKPGPLPTGIRSRYGPSHNKVAILTIDPDI CDPMVAQ  
QWNETYGTYSKQVKQMGQKSSLDLTSPLF IGVPDLPEDFQVRSKSFTGCIRDLYLDGKILDLDKFIT  
KNGSLIGCPSTETKCRPNSCYNGGTCTSTWEDTHCDCKDEFTGKCCQHQSELFMQLLGVGCVEFTQKNRL  
LPFKLPWRVQVDFRTRDLNAIILHVATAGIQMDLKIENGYLWYVVQSHVPIRLGISNAPINDGEWHHTA  
DWIDSGSQRVFVKLNLNDYNAHQVFLCLFASLRQMSISRVMIGGKYLSGRTISPYKGCVKGLKLGPPNTMY  
PISDSSLRPHGGATHRQGRVTDACRTHSCPRNSVCVSTWGDYECRCNTGYIGQHCTSVCSLNLQNGGI  
CRNNISATYGYSCVCPGFRGPSCTDRYTTECPKGWYGTGTCAPCKCSIQDNFDEACDKISGECICMSN  
HYFVSATGKCEPCGYPGSGVLSCTEDTGKCHCVSGVSGRQCNCIISHLAEITNDGCEVLYAGKCPRSF  
IGDVLWPRTFDGKQSPVKCPPGSKGIAYRMCDTVQGWLPKPDFSGCVSDAYYSFGVIVEDLENNVTEMSSP  
KAIELASELSVATKSTNKLYKKAINSFQIVQELLTHQSKQKDFGLAVAADSAFTDHVAEASSALLSNNS  
LHFWSNSDEKHDSANPLSAPVFIKAWEGYTSTLLQNLHKIFYDSTVVTTDNINMSLYSVDRDISLFGY

IQLKFLIVFVIFGYSYPLIEGRAENEVSVKLPKYLSTVNPFNITSQKAVGVVTTYNNLNKILPHTFEDDR  
TFRIPKKPSINSMIVSIQVYSSKLDHKPDDGMVTKLLEPVKIGFKLINAEAEIEPQCVFVNFTTKSSPSST  
GGWSQRGCTRSFSNKTHVTCDYHLTTFAVVTDEDVSSVTNQLEVRIPMIIGVVVSMVFLLLISFLCSLLL  
PGVKSIRALINRNITGALFLTNIYLVGVQQTSNLYWCMVAAILLQFLLLISAFSWIFVDGVHLYRVLTER  
RDINHGQARIYYLIGWVLPAILITALSIGLDAKSYGNVFCWISFDDVLIWLAGPVLLCCVIFLILLCLS  
VNAFLTskRtDMKREEILHDLRASFFVTPVIMGTWCLAIFAVNLNLTLHFYLFSLAVALLEGGMIFFFHCF  
TNKEVRLAMTKYRENCsrk

>ci0100132129

MSENETQCTLFNKDIYKCNVIIALKRRTTGSLSLVGCCFMIGTIWLFKRKYTILSQRLILYLSIAALFDAIG  
YIIGDMTPDGTTCDFEAWWMTYFDWTVLMVWSCITFNLYMNVVKQRTEKEYEKFYHLLSWVCPPLLSLL  
PLIGDNYGPAGAWCWIKHTSTVWRFLIWIYVPLFLLILAMFGGYSYIIYFLSSWQGTYPDEERTVQLIKE  
DIKVLKAYPFIFLILSIFPFILRIHNAFTAEGTDIFGLWVMTALTAPLQGAVNAVVFGLDPETRTKLTWA  
QIQLOWASRFSHAVHEYPTVFNNPLDSPTSSESVINPVNTEAVRRSSSFQKQRYGSLNLEEN

>ci0100132133

YSEEQVIVFALSILCIIIGLFGNLTIVVIRDRVIYKHRQNLVLLSLAVADVSLVVLVVPFSITNELL  
GYWPFGTVYCRIYLSVDILLCTASIWNICMIGLDRIYSVKYPMTYRKFRTMPKIRLFIVSIWLFAAVVS  
LPFVSEIETINSERGCFINASSWYIVVSCSLFFIPSCI IWPVYIRIYMIGRDLEISKRARHSSKYLYII  
CIINASLQYKLRFLKPFASFKPDGAVTKESTVYVRNPPDPVFCCLCSQTEDKSNLIFFRPLKKEINGD  
VTKSNFVKRLQSLSSVTTLSSSQSQSSCTTAMSRERRRVCIIISIIITGCFMACWMPFFLTMYIYAVCRA  
CCINNTLTKVFFWLGYLNSALNPVLYTAFNKDFRSFAQRLFHLSGRRTI

>ci0100132380

FASREEMIKSPVLRVLIWIIIGGNVTVLFETFYGLLWSDERFRNKRPFAKVNHLVINLALADLLMGVYLL  
LLGTEAAWRSGSYCKDDKSWRSSDKCGYLGALTVVSCLASVSILLLLTSYRLYGVFWPFRSQRVNYKTTM  
LFAISAWLIAALLGKHCGDLCCFRGEFGYYSVHSVCMKLYVTTKDVAWRHSMIIIFNFSSILYILAAY  
LLIALKSKKRVTKYGNMSRRHSSMFRITYLVISDIACWLPVCTMAFMNISGYKISENAYAVSAVLLP  
INSALNPLLYS

>ci0100132478

MSVSLQCRHCFTVDFFPFCEAITPKTHLLAKQCVPCSSAFKAGVAATVNGGHTEYYDFYKITDRSLDPG  
SYWQSWEALFTPPHAKFSFAIMFISQEASLCSILLNIDRHIAIANGIRYANIITNKRCFIIVGAMWVG  
IavgclstflmsdyllfrikpsalflpmpnpikakhyihmlllavipmsvvfllnvgvtgytyyklNARS  
ETVPYTNSGRHGKRKSTVASLSESTMLSAESTVFMVLTDPDGNTIGVNEINISSPTDGDNVFSSKRQ  
CWGSDVSEIQVSSSKGDIQSVGQNNFSSETKLTLPDNLSTSPGVI SNAHAPNRANDHRQDGS  
LNSHTSSILPNYNSSPRQEQLYGSTSKLKRKRKPKQDLEHKQANRTLILILLIYTMCVLPLVIVLI  
INLFD  
DDDLLQGVSDGISKLESRSIALTVTVGLFMTSSLWNCIIYNLRNRDYKRSAMSLNGLRFRVNICIT  
PTSLH

>ci0100132620

MTTAETTTECYEKNPYIRNEMGWVPKHILIAERHIYTIILAVYMTFIFLLAVSLNGFVIIATMKNKLRQP  
LNYIIINLSIADFLSGLVGGFIGMISNSAGYFYFGKTVCIILEGYIVSVAGVCGLMSISVMAFERFV  
PYGPFLLTNTHAALGIGFTWTWSVLWSTPGLIWLDDGYVPEGLGTSCAPNWFSSKNKSERIFIFVY  
VFCFF  
IPLLVIIICYGKIVLFLKQATRQSSASSNRQADNKVTMVLVMI SAFLICWTPYGVLSLYNLDYGLGAVP  
VFFAKTANIYNPLIYIGLNKQFRDGVIKMVFGRNPWAEEMSTQQRQRSTEAGQPIVSNEV

>ci0100132869

MlyswasaafLVcatLVANARAGNYLLQLNCSTTDSICDSLVSRIALQLQSSLVNITNTINSTEVPRDVL  
INDFNECSQNKAVCSVNARCINLFRTYTCQCLPGFVDHNPAPGNTCTDVNECADVTLNKCSSNGTCTNI  
AGGYTCQCGNGFVDGNLQNPQTVCQDVDECQKIRLCLMFSNSVCQNTIGGFECVCKPGFVDNPN  
SPIV  
AQCVAVSTAQSTSSFATTIDENTTSLVTTSPSTAPTTTTGSNASTNQVAITSPLSEASTTKVVTSAVSS  
STSITSDGFTQSTAASTIAHSSPSSAVPTTSSNVSSAASVLRSTSETTQESSTTTLATATTTTSTAPAT  
SAESTSVQSEILSTADMSSFTPTSSVSLTTTSEQTSTDATTMVEVTTSISPTTSPAPSNPATTTSS  
TQLP  
SSTISSVTSTTTEISTPDVSSAPETTSQPAIPGINVPLTQDNIADVANIIFTQQVLTIRPDADMISPEEGT  
ALVQSLITLVNPGENITVDQQVAEAVLAVVDLIGSSTTQFTDATSNNITLLVDDLLNKMVLLNNGSFQ  
SNL  
GSLVSGARDEDGTVRLDLPFISISGGFNATAATNVAQIKLPTNILSGSTQQRERLSFTGYMDARLFR  
TAGTD  
SVIRGSFTRSVKSTVINSAVLGSSVAGRTIQNLPNPVEVSLPLTLLSVPTQPNTSTTVMTSFYNPRCVF  
FDYQLNAGKGGWSQEGCVTSQSSGAVTCQC�HLTSFAVIMSVETTVDHILNIMTYVGCALSILGLT  
LTI  
ITYTIFKHLRKYKSKRILTHFCLALCGVYISFLAGIAAKSPTNEVQCITSGFFMHFFTAATFAWMMVEV

VDMYLMFVKVWSSVRHYVRKASVFGWGFPLVLSIATLGAHFGLVETYPNSEWHRMYPMYRETVVCWLSPL  
AVYYAFLAPLGLILLVNTFLFVIVLYHVTCKRTGRKLTRVRSNAKRVKGRQHVLNAMAILLTGTWLI  
FLINVDPIEDGALRRILAYVVFILNAFQGLWIFIVFTVRPRVVRSSWVGLLFFKHAGLDQSRSTHSSGRR  
GTRNIGSVVTRTNRKSSLDVRRDSTAPFPVSPESNRSTDTKSPLSTKSSSSSNPSISSGQKSPVQY  
RYTKDIDVKLLKVTSLNETDISINNHNIAIDTTISTPTNNGSMYSSCESNGHSANSITSDVRTFM

>ci0100133026

RIIKMSSPNLNNVIATGCVIAYISLILMAIESKQVSPYIFDVLCKVRQFLPPCAFTLAFGTMFLKTWRVH  
AIFTNVTVKKQVIKDYKLFGLSIFLFDVVIILITWFAVDPMRRVVKNSTNEIWKEGGQYVIIPQNEFCT  
SDYTFIWMIAIVCSYKGIILLVFGFLAWNTRHVALPTLNDISKYIGVSVYITVITCVIGPTTSFALKDYHDI  
SYAITSVSILLCTTATLCLVFPKVTALRRLGDRPDNSMQIRLHGVS I

>ci0100133065

LTFNTIQLTRVITWILFLVSTCGNSFVLYCLCMRQRLHVHVIITMHLTLADLAFVFFSMPMDATWNTTM  
AWLGSEFLCRLCQFLKQFGMYISSLMVVIALDRVFSILSPMSANQQRKTKILLISAWTSLLLCAIPAL  
FLFLSLIKKQFCPDQPIFYQCVDSPNINKQDLKPYFFFTMCVSFLIPLFFFTVISYSLILCEINAMQRRDE  
RITGRRDNNIERARMKTLVLTSLVTLVSLFIVLWGPYYAMGIYHWFNPRERATFPKEISVGLFVLMYFHPAV  
HPILYGFMMKDIRKHFLVTLMRCKF

>ci0100133186

IQIKGLFGNAMLLGIMKSVKLSVTDHYILNLAISDVMLLTTLPLATADMITGNLWPLGWFAKYMVCV  
YFNISAGVTVTTMTIDRFQCIQANKMRGKRTKERAKKILAVVWCISLVYTLPVVYFADKRYEVDYRYSI  
GWSKIGHFLIIFLLTMHMTFRFTVAFVPLVILIIICNTGVVCFKSKDRLFSGKVRKLLPAIVTMVTIA  
FLICWLPNFVTTLIFVFSPAVLGVIPLNHRYYLLFHWMTVCLLYFNCLNPFMYALLGGNYRKY

>ci0100133368

MDIKLGIILCCVISEVSTSNVHPQCRPVTLPMCLRNDNERNKGIKIYNETTFPNFNNDASESEVEISL  
SLLHPLLSTSCSRYLELFLCSVFSVSPACMGGGVVPPCRSLCEVVFDDCAEVVEAFGI IWPQRLHCDNFPPQ  
NGGKMVDTGSDTWGMVVSRSWLVWGEALLGDGEVCIPLSGDDVITPALSQNNQEI DNVTKY PGEYGLR  
CPAQLTAPPNPEGYTFLGMQCGGAPCPNMYMGDDELMLVRYIICVLASLALVTSFVLFVTFVFAIDTNRFRY  
PERPIVYFAAYFVIVSIFLWGFALGSDVACKHEIMDENNIVIQGAVVVEGPRDRACTIVFMILYFFTVN  
GTIWWLILTWTWLLAAGFKWGEAIEKHHLYYHGLAWGIPAVQTMVVVTTGKIEGDNIAGCVFVGLYDSD  
GLRFLLLLPMFSFYLLVGMFVLLTGFI CLNRVRKSLHDDETNKKLAKFMLRIGVFSILYILPQLALIAIY  
AIEDSNRKSWEAWFVRNCGRYGVPCPNLPHVPAQLAQGNPLPGVVFIFCMKYIMTLIVALPPLFWVASKK  
TMASWKEAVTKQRCMDDGNPLSVTQTQLLNDNNGPHARDAVRKQKSKHSDVIFGGLGGFQGSASIAAA  
EAMTSSRARARQELWEDMTSTDSTLSSRSESTLAKVLEYESHKNKGRRVVGRRRHNQGHPLPLTHNPDEG  
ENNREVDVINKPVP IKMERNRIDDVISSQSRSLSDVTRPQSSVTSQPGRPDVVKQLSISRSDATRSV  
PDI IKTTLESPLLRNKPEIPRKP KLSLAKPNTSGRVLEV

>ci0100133550

MTTSFLTHTTLFTPTSPLAADASGNATLNTSINYTGNYSGETEYAGQRNQAAALAAIIVPIFFGLIFCV  
GVVGNLSLIVTMMKMYRYQAQQGLNNTNRFILNLAUSDVFLVFCVFPQATIYSLPSWPFSGFMSFCE  
CQNVSMIASIFTLVALSFDRYFAVYATS AKQLRTRTNANRGLIFIWVAALGIGTPSALTRVQVEYEGLT  
LCVPNGHMKMWYMGYQLVSLGFLYLLPLLIILSCYMGVLHAMCKNAKSSALVRSKSARGSTKRVRVIM  
VVIVFTIDWFPHHLVALWTFNGDFPYTSETFVLLILGHCLSYANSCLNPLVYAFVSNRFRADFKKAFTCQ  
YFSEAVVHIRAYSRRFVQFSVQLRHRSSSSSESGQRDKPLNPRPPVISETLYLKRSRDEQETCTVMLT  
PEHGRKEKKSPTQTDVLLNGPHTQTTTFCYYDQENKFQTQTEVVGLLNQNNQPTFIDNDDSESDGMVL

>ci0100133606

VVPSIYIVICIVGLLNGVVLGLLLRLPDHSHIHGNKPSVTNINLVINLALADFI FV GALPFWITERFLRGS  
WIFGNFGCKFLSIFISLLNLYGVSFFLVAMGIDRYLAVVFAVRARNYRTPRNAIRVCIGIWLFIASIAAQA  
LICVNGDVSRCLWHLPGGDAYQIAYFVTRTALGFFLPVFI IYCYSFIIISLRRRSRNMSASGVRITNQ  
QKVTRLILAVVSLFVVCWLPNHIVTVINALTLHDIELQYKHLPLVSSCTASLITCLAYANSSINPVLYA  
LMKEDVRL

>ci0100133766

MRLVILLYHLNCLNTLVIFCLTEQARDVVPADFILSIVSDIGCILSAIGLALTI I IQLTNRERRKLRCTQI  
FVNLCFNLMMAIYILFLAGIEQAHNDRSCTVIAAFLHFFFLATWCWMAVYSYDLYKGLIEVFRDDKENFMK  
RAYAFAYGFPIAVVAIVGITVGYVDALADTVTCTGVNDLAQWSYRADIACWITGYSLYMGFLLPVGIML  
VFNVGVFVIVLRKVIWREHEISSSAKVSTKQNL SITLALVATMGPTWIFGFVMLLSTDSVFYVMSWFF

AIFVATQVCNILILFKFFINVTSFY

>ci0100133821

IAKTSVMRLPTIGLEKMQELNAFDTPYIMIRFPTSCLKPLSLHKAVLTYPFHCCALTNYGFGEIFQNDQ  
DEELVDCAADDERTSPEIPQIQPPVSSSEGFVDSPTLVEPTVGDVEANYHVEEYDYAYNVFSTFLCQP  
MARSMRFCLKSQPPAPIHCVVPDLFNPCELDLGGSTGIVAVSWSVACL SVIGNFFVIFMLLAVACDRTRA  
QQRHLSVPKFLILNLAIGDFFMGIIYFLTLTAMDSSGNYYKFGVEWQTGGGCDVAGFIAIFASQLSVFT  
LSVISLERWYAIRYAIQLDKRMTLRGRIVMCGWIVSII LAALPLMKVNSYRKTAI CLPMDVQELSGKV  
YVAVLLSLDICA FMVVVGSYLWMYAIVRSANGTGRSLRDLRKT DARVAKRMAVLVFTDFACFFPICFFSL  
FALAGLPLLSMSTAKVLLITCFPFNACCNPFYAILTK

>ci0100134145

LLLILPLILMVA TGNVLV IISVWLD RRLRSSTNYFLTSLAVADLLVAVVVMPPSLAMIVNNYVWPFPPQLC  
GVWTMLDVFFSTASILHLCLISLDRYVALSRPFSHRRSESSLVGIRIFIVWATAFVIAVPLPILGASDRD  
NLFIGDMCAINVEFAVFGSLVAFLLPLVIMFVMTLTILALRRQAKLITNAMTQSSDETMPNPHGKYSS  
VREAINQIQTLGFGVVIQPDGKPM TSHASTKRIYRSKNSTRRLSSSFKHRIMANINNEQRASKVIMTI  
RGYDVTSTYLQVLGLIFVFLCFWSPFFITNVVSHLCQTCNQQLMGQCMNWFVWVGYVSSGVNPCVYTLF  
SRRFRQTFNLILRGRCLR

>ci0100134273

MPTTPSTLGYNATNILLGVTAESQRQETAQMVLLICILAGACSLLTIVGNVVIVSFFINKSLRNF SNY  
LILSLAISDLTIGAFSMNVYTSYNVKNNEWILGEVMCKAWLAVDYTASNASVMNLLVICVDRYLAIKPKVK  
YRKWCTPQRAAIAIAGVWILSFLMWC PAIVLWDLFSTDTKMPTNDCYIPFMKD NAWVTVATIVGAFYIPA  
TAMCALYYQVISKLRKRRLGLRSLAIKDTLTMAVPLPVNTNNISRSDEKKSFSNSPSAVDQDKCDQHN  
KQVVS PRDSRDNP SAAATLANTTTSLLMATTVENDLKHS DTAETNSTLPHEATMPLVTRRSASIAKAN SF  
SSIIRKNSGSKCFYREPQRVVRERRVTVLLKFILTCFIVLWLPYSLIILVTSFWPSCMVPIYIWNLSYWL  
CYLNSTVNPFCYGF CENFRQTFKVIITTKWWRKEVRKSLRLSRRTSNAPYRFSTMLHKKREDLPRAKMR  
ERFKST

>ci0100134424

MFNGRFDCSDGSECPSTLDTNAFSSRDEMIGSAALKGILWVIAPLALIGNLVVIWTTTKKILKAKNQI  
SEIH YFMVLNLA IADGLMGVYLII IAIMSVQFSGKYCYMDKIWRSGQLCRWIGALLVVSTEASVMILLVM  
GGFRFYTI FRPYGSQFSEKMGIIYNKLLILLAWLLSAVLAI VPLILSDFDNL LWVSGVFFVDDTVSKTFTV  
TVITFNFAAFIMMVL FYGLIWKLSSEERDKLLAANVPTGGKLN YKKCKLQARVTRLLFTDFTCWIPI CIM  
SYIHLSGIDISGNAYAICGIVLLPINSALNPLLYAGLLDKAWKWKQCCKKDNTSQSGEGKNKKGFLERF  
QLKNSRSNDYEINSEDRPSAEFAVTTLTITISGSPIVTKR

>ci0100134571

RIWVTWVIF F ISLAGNLTVLVSVTVMRKTQSYSHCQLIMTHLSLANLAFTLFI LPMDAIWN YTTLEWLAGD  
VMCRVMNSLQKQFAMYISSAMIMVMGVDRVTGLLRPVSANQORRRIVKFLTVAWVFSFINSIPPEVFLFQS  
VMFSAGPYWPMRCECPNHVYVQCVD FHLIKKGREIFYIYSMFISFFIPLYCIIICYLIIAFSIAKMAKRA  
KATELQSSGFRPPSSRKS LARRSLQRAKKISQLVTGLITITFVICWGPYYVGLMHWFN

>ci0100134612

ALSVFADVGCAISIVGFALTILLHLINKKARQRTGIQIQLHVCFNLMVAYLLFMIGVPSVGNKTTCTIVA  
VLLHYTFLTSWFWMGIIYSNRLYNSLVKIFSKPANHYMVKSSCLAYGLPLIIVGINLAVTVGYLDKKISRP  
LCPNADNMCWIHQETLYFGFL LIVGLILLMNCIIIFTILVYKLI IKRNEVQSSAKKRSKQQLNVMAITMCL  
SMGLTWVFGFLMLLSYDPGYQSVMSWLFIT

>ci0100135442

HAQQRVKSFKYRCVYRDTKRGVWSGEGCRTVSPESKHSVTCKWSHATMFSVILSVEFLTVSYNLQKFSIV  
CESLSVASL MATVI ILLLVHRNLHSDRTMVQINLSLSVLGLHLFALASTAATTSPAACEVTVF IHFCLT  
SSVCWMFVEAFLLYLKTAPGNLRF AAYSESRPGALHRVLYMFGLCFPLVLVIVAASVGFTYDDKYQRCWL  
SVGSKMVLWAAVPIALILTINLCILIRTTSLIWKLRQQALS YKPSVKYPSEQRRLSILNMAATARALFL  
LLPILGIPWAAAFV NAGQDTEVFMYINAGLNGLQGVFMLV VYCLAKQDVTNALKRRFQR

>ci0100135674

NRSCEF YDYNSTRWSNFGCKV VADGTNFTKCYCNHTTNFAVLLISGDV GKIRSKNCAYHSVLSIAGYICN  
AVSVVFLLLVLVYVVRIRVPLFSNVKFVIHLNLCMALLGMNCVLLLGDLAARTGYELCVVVAFLTHYFEL  
ASFFWMLVEGVYLHL C IVRGNIKNRTFGRMKFLFGWGGPLLSGIAMAFGMARRKYIYRSNYNIGLNRIC

WLHHEQNLVLSNTVPMIILCLNTFFLVRLVLYTIAKLSKNQSQTKDSISISLSNAFLKLFPLLGVTLVVG  
WIGSLTYQRGRPLCDDSLTFGFILAHTVLNGVQGVGLFVVCVLNSTDVREIVTR

>ci0100136041

LVIVMTVGSIGNMLVAAIVIRKKVHVYGNIFIINLAVADLMVVMVLVPSVLSNVIANENTLPDIPCRII  
GFMMSVTCSCSIHNLTAHSVNRVWAVRSSSYSRVFSNRNTVIFVIAIWLWSIILFVPSIPLTGKPYDPK  
IMECLWDDQFSRLYTVVLLVVVVIMFPLITICVCYWKLNVRKGGVWFKKQQUESTRVRQPIKKNNDNHVYRRE  
IRLLKTLAVAILAYVICWLPYGMCIIDPINIPALPKKLNFLVQIFGWMAFTNSSVNFVIYGVMNPSYRR  
GYVEVI

>ci0100136241

MLKRLYNSLNFILFIFSKRVIGWDADMNLTTFNVDKCSSTKHWEFLVLLPFGFLSIAFNLTLLVVAATFNR  
RRLQRQSYVYACVTSTLLGNLLYVILHTWIIIDNYLTKIEESGGDYTVTWTILQVSVASMLFVMCGNIGS  
LLFVVDSTYFVGRSVNRKASEFAKGFISDIESVILGYLIVCGIRSFQQVMAPPTRTSSVMPVVKEENS  
VAESDIAAQEEYTLSDVHNAMTSLGDSDEEIKKEEKKNDKEEKNDVKKSMKRDRHENGGEVEMAVNDV  
DPRIVRSRPSFRSHSRLTFMIVISLTFVVCSPFTFVFLVDTFANISNRKVARLTTMVMYIYTFICPCL  
LLKYLPNLKSALILLFTNCSVTRIPKRRSKRETTAR

>ci0100136887

NI IHITMNFNETNANLEFCNNTTPRSLSIAEAVACVISVFTVVENMIILLAIKGPVSLRKPYPYFIASL  
ASADLLSGIEVILAIIFLPVGSPLSRVALKGMVVTFIASINSLLLVSFDRYLRIAEHAKYNRILSRKVI  
ILLIAISWAVSFIMFLIVPLVGVWSCLCICKEAESICGQCSQSFEFPTKSYIVTGVVYFLLAVVIMTGFYS  
ALFRIVKKTTFERHKHSNHVSADPKFKKRELDLAKTLAITLGI FAF CWLPVVALFIADIVITKPVKLLQK  
AFDYALVPTVINSLNPIIYSIRLPKMRETAKRVVMCGLFSGSMLVQCSYIYYVLCIFIYTVHIVKRWDI  
L

>ci0100137028

MACEGYPIVLRCPGTDVIQVVAEEYGRQTADTCATTPEKMRNTACYLPEAFDIMSSKCNNQTQCKLDVSD  
EHFPDPCPGTFKYLHVTFSCVKYMFPGCPGTLTG IASNVMTMDTTMRAQKGAWTKDPIYNPHHV FYASPSQP  
RLQKFENMEHFVNGNRAISEYDIHYQMSGTSFVVYDGNLFFVKASSANIVXRLPVANIVKYNLHTRIRHR  
ETALPGHTDRSTSHRNGANSIELAVDESLWAIYTNTHNADRIVVSKMNKDTLEIEKTWRTTYPKRTALH  
TFMICGVLYVVGSRTEGEVEYMYNTNAVRLLAKSRSFLNHNFTSLKYNPRDRLIYAWAATTSKAVYYKLFH  
GLPDPVEGTLPNYHSSAPGFIDYIWI SIRDNWVGGVSHINYRLGDKPTTTTSTTTTTTTTTTVRTTSTSE  
QSPFGPSVAPSKLPHNSATLAPPVVPVASCPSVSRDGITWPVTSLGQTRTMTCPDVLNEQATWTCTTEEF  
TMSAVWDVNGPDMNRCVTWTSSIEAQLLAGTIDPSSAAENLSRGLKMSSRNGEALRTDEVTNSARLMKTA  
ATRAGSGTTPLTRTQVRQITEGVTNAADTLLDSSNSITWKEMESSKRYKAADNVIKSVE SAGFVLADSM  
NNYGGFQGDADLLLQATVVVASTSEDIVFPDPSRLQRSTVWYDTTDSVTMPAGDIVQQASNGVTKLFAFA  
LYNNLGSYMDVKLFEDGKEDTQDWNVDSRVVSASLGSPPNREVKLSKPVKIVLETQONIDAPRKCVYWKYS  
ESLDKGVWSSKGCSSVESNTTHTTCSCNHLTSFAVLVNVHGTKVTSWGHMAYLVVSCVGI SVSLVCLLI  
CIYTFTFFRNLQSDRNTIHKHLCISL FVAELVFLVGINQTAHKVPCAVVAGLLHYFFLA AFMWMMALEGFQ  
LYVMLVEVFEGRSRWKYYLTGYGIPAVIVAVSAAVDPSGYGTEHACWLRVDSGFIWSFVGPVCAVILT  
LIFLAITVYKMYRHTLTYTDSKVN AVKSSVRGASVLLCLLGITWAFGILWVWEQAPVMAYLFCVFNAFQ  
GLFIFIFHCLLQKKVRTEYSRCFGHGSCCSKGTSEAYVSN SMSFSKQYTPGRYSAAATHTNTTLTTQTAA  
VSRIGXXQLRRMWN ETIVNGPRTSDTVVTHSQDINTVPHRVHRNREAVPENSD EEA YQYDRLQRHCHPN  
THEHHTLHHHGS DVECAHHHTGHARHQEIARITKNGATKPPASAPQC PHPTHSITAHTATTVALSTYQ  
SQCMVKLGADL

>ci0100137355

FLYSYWCDDGECVHEHVVCRRGGNDCGDSDEKYCSGNCFPFRKLPNFFTISQEQVCDTLIDCADGSDE  
VNCSGSCWPESACNSDLTCKSGYFGCDNGKCIDDSNVCDMRRNCDDGTDEIRDWHGFKCVLGKHFETCVL  
PQEQAFTTVVRCRDHADKCHTNGTCTCFTCLDQKLIISKQQCDGIIDCYDIIQNSDSCACETGMFDCGD  
GNCLTTNLVCDGTPQCPNQIDEIDCATHYMSTMKMTACPGDVNNNSLIQAVMCDGRPECFDLSDECDGSC  
NVTAPFCNIRTFMNSRNGPILYFDVKAICDGKWSDCVPRIDSEELGCPARHYCQSGDSISIDKNLLCDGV  
SQCDDKSDETNCTDRFFCENGTPFSVPMSKKMDGIADCTDMSDECPKELDENVFSSRKDLLGSAIFRATT  
WIFGIAAIVGNSATFIYA AKILRNFKSLNPITKINYILLINLSVADGLMGIYLIILGAKGLQFSGNYCRF  
DKSWRTSSQCSSLGLALVSSEATIFILAF L ATLR LCSILNPLKTKRTSTKFPTICIGVAWVLSVFLGTI  
PRYPALSDYFSSAGYFGYFSDNSVCLPKFFVSPGEPGWGYSVIIILFNFFMFVYICVAYLVISKATSSPT  
IRRHRSNQLQKMQRVTRLVLTDFACWIPICIMSF LQLGGVEIPNQAYAFSAVILLPINSALNPLLYSDI  
TYKKFKNFFASPKRRGKVVSVVQCRKSEQDRSSNEEDGAKASEQTEEQQF

>ci0100137512

QLKCVFDFNTSSWSDKGCCLNLSAGLSHCQCNHLTNFGLLVKSTPVAGDVAVSIISNVGCGLSVIGLII  
TVVVHSHIGRELKRRPARILCHICSNLAISLILVAVGIPQTQVVILCSIIAVILHYFMLVTWCWMTVYTY  
DMYMSLVQVFSQRGKSFMIRAACYAYIIPAVIVAVSAGLNDPIYESSYRAKNMCWLHGPVLNYAFLPLG  
LMLLFNLIIVFFVVLRELTWKQMKVSSQKRTVKQMLTIAVTMSTILGISWVFGYFMLLSNDPVVSVFTW  
LFAVTTTLQ

>ci0100137752

MRGCVVWVQRKFNKWDLSMVMHAYRVIICILFAIFITMGNILILAVIWRTPALHHSQSVYKFSIALSDF  
LIGAIVFPASANSILMLVKTPYMLVSYLSFLGFFTTVGIAVSVYTLTAAGVDRLIAVYRPLRYRKDRAM  
FAKRICVVIWVTIICGSLPLYVSSLRYSLIASFLVSSAGTGALILYIIAFALPVVAMWIIISVATFHMTR  
KHAMASSHLTSDSKKRSRIETRLARTLSIMVGVFTLNLVPAIIVTIAATFLTVSVYYNLPEYLDFFGTLV  
LVCNSLWNFFIYSYRDNRFKKALKVLF

>ci0100137774

MYLSPCLVGSSAFIRDIPTTEDVITWKTCCFAGICCFDVGFTLMFGSLAAKTWRIDKIFQQNSRKQVVTD  
EKLLCAVFLLVCLEIVILIMWHIHDQSVCYFVQVEYVSGVYRLTKLLENHLSLLNEDFVVCATAYTIIW  
VFCICAIVSILGVTIWMWACTKQLSKASFNDNTHVSSILALFVFCFSLPIVYLTTPNIQFIVFFTIV  
NATTVFIVSIQFIPKVSIFYT

>ci0100137803

MSTFMHRSLSRQISNKQGSQCSCSRQAGERIEGHGKGFNFNITFISILICLLSATSAAEAGNTTATIMQIN  
FTTEELPNVTELFPHNEVSGSNIVYKVGLSILLGSI CVVTVLGNLMVIFTATIFRKLRTIPNMFIIISL  
ASADLVMGIIVLPMWSQYVIGDFKWGLGFFWCDVWTSIDVLSVTASIGTLCAISLDRFVAITMPFEYATK  
MTRLRARFIIGFIWIVSATVAFVPINLGWKTKNKPEDWECYESATCCEFRPNMIYAVVSSCISFYIPLTI  
MICAYSVVFKIAIQKRGEIRNRRGVFRRASMPGSKSLLWGKREHRAVFTMGIIMGTFFVVCWLPFFIVNIA  
QVFCQCIGATPFLMVNCLGYINSFFNPIIYCHSMEFRRAFKRVLVLCGLCRDG

>ci0100137823

MDEFSTSGMSEINDNNSLLNLNSSHENLTAMEPKLALFVCLITTSISLVTTAGNIIIVIIAFYMNKRLQT  
ITNYFILSLAYADMVIGLVSMNLFYIIVQGEWNLGPLVCDIWL CIDYVACNASVMNLLIISVDRYLALT  
KPMYTRVYKRTKRRALMIVGAWTVSIFILWVPSILLWPLVEGGRNVQNKCYIRFILASPAVAIGTAMAAF  
YVPVVLVMSILSVYINRVNVEHRKYANTFIRKSTNEKNIGQYSVNKTLNTRSSAMSADRKERNTQGVKV  
WKMRRNQNTLEEDHVSVHLFTFKNIPFLLLYFGLHTRLERVFERMWIKFELQNKENGSKIQPPLAVIK  
VETSSFDHLGQEPHKDEITIEKSKSSFRLSETTASLLNATRQNRNMSARENKAARMLLCIMVVFIIITWA  
PYNILVVIISTVCGEDGCVNDILWKLWLYLWLNSTINPACYAMCSPEFRRTFHRLLRQRSN

>ci0100137935

IALAIIIAIIIGSMFGNIIIVIAVRSERNLQTTANFLICSLAITDFLVAACLVMPFSALYEISGTWVFGD  
ILCQTWTAIDIACCTASILHLCAIAFERHRSITSVAVRYFSQGRRTVAPKIVLVVLAICISIPPIIGWK  
PSSQQQTQVNNVTTAASTVQRCVEVGHYREYTLATLGSFYIPLALLLTAYVRIYVRIHQHIRRSESRTL  
ESLSSEDALSLRSKRCPPGRIICSSRNKNLGNKKEMRVNGKNKVVRVFDQRIKPHQMTKGT SVAQENKG  
TNVVKRTQDTLHYKRMP SFETETENLRGIFKCKKYRHSESQRLLNQRRSSIMLAHSLSLRAKVKLLKA  
REVRAIKTLGTIVGAFVICWLPFFAVTLAAAFNCCKMPHTLTSIVLWLGVCNSLVNPILYGAFNRDFYAA  
FKKLYTTHIYKIRCR

>ci0100138509

MCCYNLSNFQVFDSEVLAYIAAEIIIAVFALFSNLFVFAIIRFKNLQTPTFCLLASLSVADISVALLA  
IPSAIVLRIGLGTVCFLCLAMVAFQLFATQVSIWGLLLIAIDRFVAIHFHRLRYRAYITLYRVKVGIVVS  
WLGGSVIALGWESAVGASAENLHAVKRCFAFEQVVSMEYMVYFNFGCVLIPFIAMFALYLMIFRVNADML  
NVTKACYRDSVAGWARRLRKSKLLWKEFTAARSLFTVIGLFALCWLPHIINCITLYCPDCRRPDWLM  
LAVLLSHANSMVNPVYAFRLREMKGALRKLKLVKYMKTTLTK

>ci0100138913

QVIAISIMAVVLMVVTVTGNFLVIASYRANRQLRTINNMFLVSLACSDLVIGVVSMTLYPIYMITRTWML  
GPILCDIWL CIDYTL SMASVANLMLICLDRYFSVTRPFTYREGTRGKTRIFITIAWVFSMLLWSPAIVI  
WPLVRGRTEVEDDQCQIQFFEDATITLVTAIFLAFYLPVLVMTVLYGLIYRETRKCSQYLEYLSYKSRST  
SSASPFLNLRSSYRQTPNGSPKLSFPLFSKAPGDGGNEPRSLGSGSVSLFQRRSSKGRSNNDKLE  
SRIRSNSTAPRISLSPLAQEAKPDFAAKTEDSDFCEVFVPPPKPRSKSFVEKVRSRKHSTTESKSSQSSN  
ATKTESVLERLQKQSSASEQDSL GARDRSSKVRVAPKVQVSNHDDIEITCPRQRARSGGSVRMPSSERK  
AARTLSAIIILAFVVTWLPYNVCAVYKSFCAEGHECIPAAWDAAYYLCYINSTVNPFCFALCNKTFRET  
IQLL

>ci0100138955

MATTPILPSDFIFFDQVNSTTVLPPGNYAANVSTDDIDLGSSFNQTQGNICEPINNPPLIITAGIISMAVI  
IGNGLVILAIIGGNSRFFRPMYFIVHLSFSDLLVGLMLLWNYCLAGIFNINNTLTSLSFLFGIWTVSAC  
CSVFGILLLLAIDRYMQVVHKALHKLYFNQFTVGLSIFLSWLIPLLGFLVPIPSLNLSCKDTCRCEGKYM  
ECKPVTICSQIIPPYTKNYVLAVAMYLFLIMPWPILIYSLIFIKARRSTQVLRQKLRTRDIRLIHTLVVI  
MVVLIVTITPSGVILIIIVVDYTFYIVVIATLNSLANPVLVIWRITAIRVSLQRRFWCFFSPPKHPIESR  
SSRIGKKTDRFNSDVVSDVSEANHRPTEFLFCGRMTFTSNVSDISQESTPDSQRGSAHKSPWSRNKH  
GLSVELQPVLPKPSHSPLCQNVVVEEVWRENNSHLSSRSTFRTRKRVSSGSNIDEELPLRPVQN

>ci0100139176

MTSSIPLLAMHRVNGTALQRQIRITELYIIATVFI LGLIGNSCVLVALWQRYSKHTRMHILIFHLAVAD  
LIVVLFEMLEPEWIRFGFGFFASDAMCKFVKYMQILGMYGSTYVLLCAAFDRYRAIRYPMQSFQLTAKRV  
HTSVLIAWGVSAFLSTPQLFLFEKPETRNMCRMKRFPSAAFDQAYTTWYFFVIMFIPTCFLIYLYGMIAV  
LIMRNKQKNKAGSSTSPVRQGGIFSSTTGNFAPRASSTAGISRAKIKTVQMTLVIVITYVVLWTPFFTV  
QMLAAWGAINEDHIAASCIKLLASLNSCTNPWIYMAFSGNLLGDIKRFILCQKKKSSFTNKSROGDTGK  
KTRNYSAFDPTTKETDMTATTNMELSVAKPKARNANNKKKYQTSSELSDIASSGLMENESEN

>ci0100139179

PGLIIALYSVVFILAAVGNILVLTLSNRMRRTVTNCFILISLSLSDLLQALVCMPI SLIGQILKRFVFG  
SVMCKVLPYFMGISVSVSTFTLLALAIERYNAICNPLKSRGWQTKSHAYKVI AI IWTISFLIMSPFLVFS  
KLRYMPLVKQKCTLACRLYFGGEQARQAWYVLQIVFLFCIPGLVMTVAYTCVCLKISEGFQFETKEKKP  
STRVKGESNGNGNNSDDGTNRLQVPDKKSNRQLSVRKSNRKRCDRSRLQTEGQLLAKKRIVKMLIVIV  
VLFFVCWTPLFIVNVWKAFDPKGARKIFSGPHEFTQLMSYISTCVNPVTYCFMNKKFREGFLKAFICCLP  
NRCAA AVENQVK

>ci0100139268

CVYWDFDTEGWETAGCWLNYTSDKPVCLCSHLTNFALLVVVSYCIQTTIQVPSGTALS VVSDIGCVISIV  
GLFLTIIAHLHRDTRNRRPAKILLNICSNLLIAYFIFVVGVSQTSNRTGCKVAVLLHYFFLTTWCWMS  
VYSYDMMYSLVKVFKHSQHQLQRTSLFAYVVPFVIVVISASVTMGYLDLQNEFSKSSSYISDHMCWLR  
GNSLYFSFLLPVGMMLIFNIFVFSVRELALKNKSATSPNLKRSTKQSLTIAITMTSLMGLTWVLGYFI  
LISTDVVYVTVFWSLWLFALFNTLQGFIFYLTSVRRSDMRSVWLR

>ci0100139465

MAKEFQSEDFVSVQNITKSLEEEESAAAEFAFSITNESASAIYGEVEIGVTVSNSSSKSCFRNSTSHEDC  
LLGFSKVAIPNIVVENGQLGKNST SILVATQFRLPNVILEKLEPKYEEKGTELFQTQKFVDHTGSQLSAS  
VYDKATRKKLRSSLTYLMTKGFSTSGHEIGKRRVSSITYSCEYYDVIRQQFSSTGCRLMTSDEEDVTCFC  
NHTTIFAVLLSVTTFQPPLAVKVISYVTELSVVCIFLTVLVLVQVRKQLRSERTVVQINLTASLLLLHL  
LNI IHELAYLHTVSTALTALFHFFLLSSGAWMFLEAFTLAMMTSHKALYFDSVSRKKLYIFRVFLGWGA  
PFMVA MVTF AIGMSTGNFYDRCWLTNKGGLLGA AVI PLALICVVNF AVAVKMPVNLNISKLTRIDMTH  
VKAALGFIFLFPVLGLPWILGFLTGIDSYEASVAFMYLNVVLNGLQGVFLMLIYCVIGSDVRKAWLRKI  
SCVLRTEVGSSTETSGGVVVT AQTSLPRT

>ci0100139945

CKGEWDKITCWPN SAPGRVRLPCPEYIIDFDHTGHALRHCSRDRWAMVRDTRNTFSDYGSCNIPREED  
VVEMIRRGDLYTVGYSFSLVALVFAMIILAYFKRLHCTRNYIHMHLFASFILRAVVFVKDRVLYYGAG  
ILDINTPDGEMTLEALKNRVDEIDADRSSYLVGCKLVMTLFHYFVATNYYWILVEALYLHSLIFVAFFSD  
KKYLWRFVSTGWGVPILFVVPWAI VRAKLDDTACWDIAVTEYKWIYNGPIVVANVINFLFLNIIRVLWY  
KMRERGP IGTKDNRQYKKLAKSTLVLIPMGVHAI VFI GMPDDISSGTWWDIRMSFDLFFNSFQGFVVA  
IIYFCNGEVQAEFRKAWERFNL SVEIKRGRERSR SSVTMLTSFNSSASQQVRIMTS

>ci0100140006

YNYTTFPNILGHDNADDASDVLYEYKLLLLDTHCSTHLRFFLCSLHFPMPCTPKVEVAIPGCRSMCEKVRAD  
CEPVMRVGGVQWPDTIDCSKLP MRNEKKRLCMVPPGESPNGEAPKVDTPNPQPPSVTLDESGAGPHIELEI  
DDEDENDKAAKYWAQQLELNPGEYEQWREPIIPRIGKMKQCVPRCEKTTDILFSSNHKQIAYWLLFSFS  
LLCFISTVMTVCTFMIDSKRFRYPERPIIFLSICYCVYSVAYLVRVSVNGPLNSMACMEDI THPAGASYFV  
KGGIQGTGCTAMFFVLYYFGMAASAWVVLTLSWLLSAGFKWGHEAIEAYGFYFHAAWLLPAGQTI VVL  
ILGKVDGDELTVGCYVGNLEPEESLMYFVI IPLTFYLI TGTVALVFGFGYLFKIRR VIRHQGGKSAGKLEK  
LMWRIGVFSVLYTVPAACVVAVNFYQYQNLGVWMNQIPRVNLDCTLPDSIPSLPIFGIKIFMSLIAGITS  
GMWIIWSGKTVESWRKFKYK

>ci0100140016

NTSTSEDRYLVSNSYVISAASVQPAPVELLKTQKVKFLLKHKNTSVHCTMRCVFWKPKLAVVGNSSAGHWST  
EGCKRIRSNNTHTTECEDHLTNFAILMDVVRGVQLDKINNEVLTYITWIGCSMSIVCLVMCVFCFNTLRGL  
RSIRTSIHKNLCFTLGLAQTAFLLGADKTSYPLLCPIIAGVLHYLFLTVFAWMCIEGMHLYVSLVKVFEI  
DKSSRLACYAFAYGSPILVVAITAAIRYDGYGTTQSCWLHAKDDLMIWSFVGPALCVICVNIYFFFIAM  
RVMRSHRITTPAHRSLAKTKTWIKGSSVLLCLLGITWIFGVFFVDSKSVVMAYLFTTCNALQGVFIFIF  
HCLLNERVRELAKYARRRNLCPVWRGRYHVTNSVTRSNTTTSMGYRSRKSSSGNTENSQTNQNGSWS  
WFKSKETQNDQSVIKRSVVRTITPKWKS DSKRVAGELQFTTELKSSSENKITSTTTERTESVVEVQKHE  
PIQHNNENVVALKNKLTPLMLNRKVVVTVSDESTSCSDGADVDFGCLNAAFEGEATVTPLPERKERIERFYR  
DYAEHFSGQGNKAESGIFRNNNSMPVKVRRDTPQPRAPATENGVS AKSLYFSVGLSLKVKSTTEKVADL

>ci0100140366

MDPDDQSLETSSSFPTTEVFTTTPVSPVHYEAPPRLNIVEQIVPVLYCIIISFIGHLIGNGIVLYIMRHMVK  
NKSVDTVYVTNLAVADILLGLTLPFWAAEHVMGRWVFGTIMCKIASCMTYMNYASIFFLAIMSLDRWLA  
IVKAIKCRTRLRTVQKAWIISSLIWGLSLFFMILPSLFRTTKQYRHGDRCVWEFPGMITYHLNVLYNLRS  
IVGFFLPLIVIVFCYSDLVRFMRKRKIRKKSSDSAGSLLTQMVLVVVSFCIIISWLPNQVTNFVHLLKLR  
VCTCTTGYQFRFTA

>ci0100140881

MSNLSFCPEDGNTTSAEGDAMLTALIAALTSLLSLLIVVGNGLIIVSVALVKLRQPANYLIVSLALS  
FLVGLVVLPLTIVYDIMGWVFGPNVCDVHVSFDVICCTASIMNLCMISIDRYLMITQPMTYPKRRTGKL  
MLLLIATAWVLSCLV IIPALFGFTKNVKDEADWLPNNDVSLVGNETFALAGARNPYLAIDGNGTTQWVPG  
NNELSEWHFTVDLGVIHQLDIVSIENAKGSKQHDLQYSLTSPCRESTAWTSKATFAVESGSPSRQETRLP  
TEVEARYLRFAINQTAGYENPMLGEFQVFGIKKYGKACLISQERWFTIYSTLGAFYLPPLAVMLCMYWKIY  
LEASRFNARHRLRSYSTTGSQEWSSGSPSTPDVTNNRRHEQFYERKRTYSSNNNYTNDKFHSTKSEGYV  
TDSSEVLLANTAVTPIVVTDLDLKAKDSVFEDDTVSSSGDEFLPSDRLEKVEPKTNGNGVVLNGHVIK  
IAIENDRKTNSLPCRGLVHRNGSAVSLPCKDSTNGNAVNLIRSSSGVVCGLGMKNGFPRNGTTRHNGMEW  
RFPTISEVDILTSLNEEGEQTNKETETETINGKINEEYRARTLYTRASANSLLATEKTPKLVGKPSRPR  
LFMLYGKPRLLRATSTPCPTTTNKPNQHTRKSSFRTLRQNSEITFPCNRRPTVFNQIRRRVSLATS  
MRNVKATRTLGIVVGAFTFCWLPFFIVTFLRPFACPIPESQDCIPLWLVRFVWLWGLYLSALNPLIYIGF  
SPDLRETFRFLICCKCTNVDRRLAQIELRQAI AVERKASMASRSYAPESIV

>ci0100141310

EILTRYVTVGHALLSLATLLVALALLACLKNIHCTRIYIHMNLMAAFMFRGLIWIILHSAAFRGEQDLMEI  
LNNLVTLQNWCRLYNVFQIYFVTANYFWLLVEGLYLRLLLRVAVLFSHTKYMKAFLVLGWGLPWLVPVAYF  
VPKSLDPEENRDCWYEDRNSAYWWIVKVPILISLLINFIIFVNVCVVGAKLRVNQRQQADDRREDYKWR  
LTKSTLSLIPLLGTQYLITAFVHFDSEENPTAEFVKKAFEVSFVSIQGLLVAFIYCFNGEVQEECGKTW  
RRWKTRWELERRERKHHMRQRRRSMNHSSITNLFTSVVTRKSSLYTGES

>ci0100141384

MSDVGVTLSAEKTTSPPTTVDFVGVVDDNTFVVLRTIVLLFLLVLSLIGNSLVVLVVAQSRNNRHNPFNA  
FILSLASYGLLECALTISLATGFSIEETWNFGDFLTGFNASFVQLQNTGIFLTISAMAI DRFLAVTRLT  
YHTHSSVHHANYAVLYTWIQSFI FALPLLQNRMLGVTARPFVERCLCGLVEGTSVAFVLLLLILCFIIP  
LLITIVFLHLVNKRAKYERKRIRTSSTPHYTVYCLQESMLLKEARS AKFVLLLLLFLMAFKAPYVILD  
TLTQLNVGGAFYPANNSTIKVDGSKFYFQTVLSWMMFCFSSLYPVVTFIYFKEYWKRIKNWILCSNATS  
IINNGHLRSNPRHRRRQRRRLNENKRKKINPKSSIKHATAPSSVSSNIPSEKVTINGTSSGDNLVFRVPVLYA

ATDGLHLVASGKNNNNNSPTQLPTGASEPHQVVDEVEDVRPSSVVDKRV DVRC SRDCLRDDVIDDDVIY  
ITSDFDEDETESELNNSTNSRTLIWPHRHSSDTMWNFSVSRFSEGDPGIPPDEGISHPHTPTPDDVTNQL  
TVTND CDVVRGSHGNKIHPNISRPVND SLEDAHKDIVATTKHKSSRSKISPFQGHAT

>ci0100141547

LQQACRAEDGFFDCGNGECISRRLVKDTAQNCRNNADEIEAPLSNCTNSELRCSERNSTKCI PRDWVMD  
GVPDCGRGTDELTA LVC DQEKEFQCVWNGRCIPRYRVNDDYKDCEDGSDEAINITCLNTDYQCENSLRCI  
PRSYLCDGLDHCGDCSDEIEECEVPVISPCKNEEEVLC DGICLPYSKVCNGIVDCHISSIDERCCDGI  
TECRNMEDECSERANCENKPKVCTDIP I IWKCDAVYPPDCLDSSDEINCS DSTHFYCESGTPFFVRRDQV  
VDGKRDCADASDECPDMFQTNALSSREELIKVPFLRAMVWFMAFVAIIGNCVVFI LSSKSLIKNSIKAQ  
NARAPGVVINKLLILNLSIADLLMGIALLIIGIKSAQFSGQYCW RDLLWRSSTTCDVIGILSVLSCEAS  
VLSLVCLTSYRVYMIYFPFKSTTVSTKVASIWMCIWVVCFILALLPLVDQLSLGYFGYYSASAVCLPRY  
FKLPTDQFEINAI SPVIMSFNFIALLYICGAYAAIYKRTYSGNMAVNTAQRQHTEQRQKIAKKMQRKISI  
LILTDLCCWLPVCLMTFISLRKAGLHDSVYSFSAIILLPINSNLNPIIYTDVAVPKLYTKLKQIGLQVRTL  
VNNTQTQITSTTGIPNVTTSV

>ci0100141557

GSFCGAIWDGYACWPPTQSSKEAVQNCPSYLPFRNTEEFVAVRPCQANGWEFRYPTTQYQWNTNYSRCQLQK  
GQEAUVAKYRLAISGYSVSMITLLVALFIFHFHRSLQCQRVTMHKHLFVSYILNALASVLCFLKFIHTLH  
KCSVNTLLKDFFFQFDLFIYNIFSSPFIQVYCKFLHAIHQYTETSNYFWMLCEGIYLHTLVVVSVFREK  
QNLLIYTGGLGWGFPAISLLLYVVTFRVLDSSCWATPTTDAAYIIHGPIAIALVINFIILMNLLRVLLSK  
LRANRNNIQRYIGAIIKATLVLIPLLGSQHILLTIALYIPNASVLRVLSYITNVLSSFQGFVAIIIFCFCH  
EEV

>ci0100141702

VAFSGVICAVGLVGNFLVMFVVLVLRFRKSVTHWYVLQLAIAADSLFLISLPFKMIEDINGYWMPPEWMC  
KGGKETLLFLNYYTSVSFLMIMSIDRYIAVCHPFSDTLQRLRKPKSIIITVTTWVAGLLICIPVMLYSFK  
VGIQPNCRCTDTFTDGTPECHYHTRAYGFKVFNIFNFVVMFVILPLAVMGACYGLIIFRLTSGPLKDKSE  
SRSGTNKSSKSEKDRRVRTIMCLCLVGCFFVWCWLPFHAVHIAKIVGISGQTDALCRILPVVASLLAYSNS  
ALNPYLYSFLGGNF

>ci0100141745

LFDCGNGQCIPRLLRNLRGDCDNNADDEADASLPACANTEIRCGFDGNSTKCIPREWVMDGVDDCYQGT  
DEQSALVCDQRKEFRCPGNRCVARYRVNDGYEDCDDGSDEETNMICLDTEFDCLGINQPPLSPERRCIP  
KTWQLNDRDCTDGSDESTVPLNGSCPDSGQCKVSLRCIPVSYLCDGLNHCGDCTDEIEECEEPVMFRC  
PNDTLHRTCLHWSYACDPYADCPNVEDDIIFTVGPGLCMDGTTVIAPRQICDGFDCSDLSDECLCVTTSC  
SQCRTGEFLCDDVCLPSSKVCDDVCHLSLMDERWCTKESVNCSESTHFYCESGTPFFVRRDQVTDGNR  
DCADASDECPPNVFQISSREELIKSPFLRAMIWFMACVAINGNALVFFFSLKSLWENSKKAKVLQAPRVA  
VINKLLILNLSIADFLMGVALLIIAIIKSAQFSGQYCWDRLLWRSSTTCDVIGVLSVLSCEASVLSLVCLT  
SYRLYTIYFPLKSRVSTKVATIWIIGIIVLFCVFLALLPLSDHLSRYMVTTIRIKTTPYLKTEMIRAVCL  
PRYFKLTTDQLGLNEISAVIMSFNFITLLYISAAAYAIYKRTSSGAFSANTANRQQTEQRQKNAKLNQRK  
ISILILTDFSCWLPVCLMTFISYRESGLPSFVYSVSAIILLPINSSLNPIIYTDVAPKLYRMLKQIRVQV  
RAWLN

>ci0100141751

SISEADEILNDALGPCAPLAFDNLPSYVTLILIVLYSIIIMTVGILGNLCVIVVISSSRKLWVFNFLLLS  
LACSDLLALTLPTWIIHNTSYDYTMGSLCKAIPPLQGTAVMSSINCLVAIALERHQAIIVYPTRQNI  
SHLRLMIAVALIWIICSFQFQIPQIVVLDVVWVKQKTPVKPATVWYEITVHTCQETWAPQQSQAYSIAIIV  
IVYGVPLALLVLLYGRIGYFVFSRRGIENSLSAERSERSRRIIRLNVMVLVLLVTSFALLWGPYFVQCL  
TVCLTSYCSPELVGYLQLVGHVVALDPLLYAALHERVREEF

>ci0100141764

MSFEIKIVVLLLSACCTLINLFCALVCIVSNFKRLRQRMYIFIIINLTIVDVIVGVAYMIDVVTKILRSEAS  
VTSQSEGFGATAATEGLKIASILLSALNTSVVTYALHKRTTSMGRHRAESLNNDTTGNPLHIPAFDTMLR  
VLSLGTQTPSANRKGSRNLNQSPPKQPSVNGNSPKHINGDCLECEEEETSLAKKNESDRRIGQQRLSPGD  
KQESSKSRKKSMSRLTAMLLPRTSLVSIRPSNFPMSSTYSQSYVGRHGNSVSVVSVRTTVAILLVIW  
IVFLITWLLPVATRAVMKASGSSNQVAEIFSCSLECEETEYFPNIEQTNNDKQSPFSDSNDYDTGVMAS  
NLSTGYVKSEENSTGLHPNPIRRIRHTKSRIIRYKDALFNESGFVAHSLLTVTSESNYTDVNSSGDFPIP  
WEQRPMCPESCSNLFYPIKSLHVIIFHALVITVTLWFLMIIISLRLWLWRKHSKNVFRCSALWRFILYTA  
FYLVAIYATYVAVCVLDAMHTNTPNDANRATSIMMLNVTMNYDRTNRSMTSQPANLVPPHGFEPSSLLLE  
ASCLVLFHSTIAPSLYMVRLGFRLLLAGIRFR

>ci0100142029

DPISSRDEMIKLPWLRWLLWMVAIVSILGNTVVMVTTFFWRELHRGLPQIAPLSKCNVLTNLAADV  
TGIYLLIIGFKSSFSYQHKVSWQSSSTCRRLGLVIMTSCEASTGIMVIMTYRLYAVIKPKVGH  
RPLVTALWGMVWVLSFVIAVIPNIELVGNIGYFGKHGVCCLPTFFPTVKDGMTGRAKIYTGFMVGNFVA  
FIYIACVYLMVWAKSSKLGKRRGAGGNEKLSPTVAEKRLLSMHKRIARLVLSDFCCWIPACIVSFCGI  
SGVDLPQWVYPTAVVLLPINSALNPLLYS

>ci0100142069

MIGNSIFRVGFVIGVLSLLGNFFVIVSSIFRLRKAALKTSFLWFVINLSLSDCLMGVYLIAISSKGAE  
YSGKYCYHDAEWRSSNLCSGFGSLTIIISSEVSALTMALMATFRMMSVYKPFEMANIRKRTFIIPTIFAWL  
LGVAIGALPLIKTDSGYFVSSICICMPTLFVTVGETSWEYSISLISFNFLVYLVVYVYIAIFKRSTKMK  
SSAQRSNKLQKTIISLLILTDFCCWIPICIMAFVSLSGVQLDRIVYVISAQVLLPINSVINPIIYSDVGRY  
VVEKLRKKQTPPNQKGGQSSAFTSTTIRSVTPINRTTSCI

>ci0100142144

MYKGFNYLHITGLNIFTVVVYHFVKTLNWTAAELVQYQASVVNTAPAVIGAVVVFVFTVTSSLYHLLLLSC  
ERLYAIQWPI SYKLRSSSLHRVLIQVWIVSAVTASVPGWFPKRFFVFNYPFSLFVYYPYINLVDARKNID  
SVIVLMGIFIVLPFVLTVKLFPIVALSIAYFTLRKSCAEIVAPTAACFYLSMGNSLVNVVVYSLFDKDFR  
KCVKSNLRLRCRLC

>ci0100142353

MFFAQHWCDGKKHCEDEGSDEVYHLPGFCECKPRRGIQPNIASCVLPQRNLYTSLPFCEYNQNLCALLEGGR  
FQCFDGMINSASQVCDGEIDCYDLTDECLCENKTICNDVLDGDSRERCQVGNKLLCYGECVMDKAVICNT  
SFACEGDRNSKYCAAYLPSNETDFKCPKGVKVKACDGI SECLNREDECDRTCANQTHFCSVDIACHKKLF  
FLVDNRYCDGKPSNIKGCPCFGFDETNCTNRFYCTNDSLENI SKKRVCSNGWIDCSNGEDEAMKRCNSTRFY  
CLNKGVPVLSVGI PRVENGIKCESDGSDECPNNSRNTSLFSNAFEMIGNPFLLAMFWIMGIFAI FGNIVMF  
IGSVKFKASTKPLTSCSLWFINLSIAGFLMGIYLIAIAIAKAAEF SKLYCYFDTDWRTSDTDFLGALV  
LISCEATAFMMTITTTFRLLITILKPFKARSVKPAWSVATIAAWCFAILGITPTFNTSSGSFDYLRKIKG  
EFGYFGETSVCLPRLYEKVGHPAWEYTTFLITLNTCLFIYIVACYVILYKQRTKRMHVVRKDGKGGKSL  
QQRIFVVLVAHFCCWIPICILAYISQAGANIRNDAYILTAGFLLPINSALNPLLYSNILTNTFVKTIYRKL  
KGSDWCSFAVRNNDEEAR

>ci0100142526

VGIIANTFVIVVISIWERCHRNRTVANSFVVNLAIADLLFLVVLPLYMPAILTDGWIYGVGMCKVIEAIK  
YINFRASILFLTMMSVDRYLGIVFSMRSREYRTRKNAIMTCIVLWLLSIAAAVPI LVFANVDTVKKECVL  
QFPGYESDFVSDKDLDIYGNFALFFVPIILCIIFCYSAI IKAVMTRHIQSSTKAQARMVALLVGVFVILS  
WGPFTQWKLLTL

>ci0100142971

TRPSCQYIDETTNQWSPYGGCKVVGKQGSVHCFCNHTTKFSVLFVVRPLPFEMPPHASNILVLEFVMEG  
LSFTCLTITMLSLFLVLRSSKSSSTSTAARETIVHINFIAALALHLVRLISEASLGNNGMCMNTVVLS  
HYFVLASGIWMLIEGLVLYLNLVVKSMKFNRLGWYKFAAGWGI PFVIVFISAGEGMYNNFTNTYCWLGTK  
HNMIWSATGPLIAIFI INFFILSHTVALILKLSLKSAMKPSSSKSNHGQHLHTTKGILVLPILGVPWL  
IGFLVNIREYHVNI VQYI HVSLNGLQGVFIFIFYCAVNKE

>ci0100143048

SMEGDIMLAGLFP IHQNEGCLDLEDMSIQRMEAMAYAVQKVNWP NFMKNFTLGFRIFDTCNSQSIALS  
RTLGVLPHCNNCTHYPVCFPECP SLVAGIVGPESSNALLSAHACNLALTPIISYFATSLELTDKTI FPT  
LFTTVPSDDFQVSAMLELLEYFGWYFYSFIHTNDSYRYGKDALDYVQTNMKEMCLASVQQVSGDGSNS  
YDEVVTTLLRYKQSQTSVIVVFTDGV SANKLFCVADRANATGEFVWIGSEGWVSLNDISDNLHVAQGS  
LTFTPHTEIDPEFDEYFQNLNVTHNNPWKKEIWKDHFNWYLDIMCYRCPILPHPTIQMISCVIFLENSCW  
NYKHIDETNGYLPDSTVSLVNDAVYAFAYAI SDYVNHTDDIISENGDVIVPPWKLINYIRKISFPGSAQR  
REITLKGSIAYYDLNQLINENGTFDYVVRVGSWDSVDGLILDASAIQWPDHRKTPISYCSEFCHPGEVQV  
LIKIACCWDCERCAQGSIVVNNTRCQEQDFYWPNSNYSRCVPLELEYLHWYEAPAVLLSVFACVLLCA  
VFTSIYYIRHRHRLIMASGRELMSVIMFGV I IQCVMVFFIIAKPTEHTCFIYRFIFGLDLTISYAAIVV  
KSNRIFRIFTHGLKSVAPPRWTKTHQLLITGCIVLIQIIVVSSLCLIFPPKVVKYQAKPGLAELACSLD  
NNVTILLPLSYNFLLI VPCLYYGWKTRNL PANFNESRFIAFTVSTTLVWVIAFIPTYLTVDTSSKIHVEI  
LATVEIMSAANTLACLFLPKIYALKF

>ci0100143057

NRYLQLAIADTLFLLMLPFTASSELSGEWSYGIVMCKIKEAILFINYYASIFLVIMSFDRYLAVTKAF  
SSSDLVVALRGPRAAGIITAIGWVISVGISSPLFIYSTVKGKCNVCAYKFPLTKVENSTMVSYVANLFFCF  
PLLAMCCFYGLIRAI VTTQAGAGRNEKYRNRVTVIVLALICLFLVSWLPWYTVQLALMNGISLSNSECK  
RLTYAVRLIAYLNSTLNPYFYG

>ci0100143146

MNTTAILPGAANSTQTVFNRL EACLLTVSCEHDDL S ISAVIVAFVLALENCALAAAILTWKLGHACKM  
FWFLWHL SVADGMLAVTFVFFHTMVILSCP NHFSCQSNSVQSTVVVFMFFANILSSHFLVLAATLDRFI  
AIKHPLRYSELMTSRRVRIVSLIIWVVSFLIPIGGGLG LNFNGNSSIAYSVTTLTAAVISLTAAVVIALN  
IWMVKFAISIIMSQT PPPSTQHQPSRPSIVPNIGI INESLKPATTLALFVVVSVIVSCAPWSVALIVCEE  
VKKCTIKQH QDYTLVVLVLFHAIVIPFIYGFVVEEIRHRV IIFWKRVFDRAPHPAGVYR

>ci0100143219

MRTGYLVKGTFEWQKCNNYNDCGDWSDEKNC TETETCMDRNMTTCDCHLTGDCPVQGLLYHDP CYSKIQTC  
NGWNDCGDWSDEKNCNYTCNSNQIACECNSNGSGCLPAKEGYISHCFTENEICNSKPVCTDWTDEKNCSC

RNSEFNCGCILGNCTSRNGCVSKENILNGKFECADKSDEPYRCFVDGKLNCFQCHDDQKMLISTKQVCDG  
VIDCYDLSDECYCSNRTVCYAVLGNRSRSECPIGRLNIDDDQVCDGKLDCEDEGSDETESLCSSETRFYCLNK  
RPLSVPMSDVENGIKDYLVGGDFLRAWLWILGIFSLVANFIVFGTTVYQLKSWHLEPLKKAFTFFIFNIA  
VSDLFMSVYLLGISIKGVQYSGRYCYHDVEWRCSVACSILGAFSIISSSTVSALLLALMATFRLVSVYNPI  
KMGSVKTTTTFVMPVFIWILGLVLAFLPLVPLNSEYGYFGESSVCLPDLFLKVGSNWEYS AFLLLTLNFT  
LFLYMFCSYMAIIKRSRRMKSENKKNKKMQTTVALLVFTNFCCVPIISII SYITLAGVSYNPVLYKVSAG  
FLLPINSSVDPIIYSNEVVNAAKKIYNHLRKTVRDIRSD

>ci0100143261

YVLQLAIADSLFLAML PFKASESLSGSWNLPHFLCHLQQAVFMLNYYAGIFFLTVMSFDRYAAIVHPVSA  
PWRRLRTHGNAVLITLAVWALAI AVS I PLFVWSDVKHCKCTYMFPRSAEEFQHHGIWAGMHVFVAFLLP  
FIVMTVCYSLITWRV FHPAVSSANRYNNEKDV LILLCFTQVSLVLMFLLCWL PYNIVLLAKFAELPYSGE  
TCTLIENVTIVLVYLNMINPVLTYTFL

>ci0100143300

HWFIVQLAVADFFVGLIVLWIGTFSSFLDVTSLMSGIATYGVLAATSTSTLGVLFIAVDRHFYILRHR  
RYKQIMTRLRVGTAI VVACVVPATFFVVPVAFGWNCIQSCDCRLYNIDQNRRCYCFGSHCSQMMTPFRGET  
VLGGGICLLLLLVSVSVYVKIFVQVRFLTKTTGRQRNRNSEMOMIKTMLIVLSGFVFTTGPLAILCVV  
SYFHNVRELHNTMRILVISTINSILNPIFYFWRI PDLNSNLRIMIRDSLIFCCPSCFADDN

>ci0100143330

MRDLALAVIYFTVSFFGIIGNVIVLYVLLRQRGWSVTTTTYLFNLALSDLLFLCIMPFWGHQYLNELNWA  
FGLGWCKVVGSVTSINMYASVFFLTAMSVDRYMAVVHATSVNVVRNSCIARWVCISVWSAALLLSLPRVL  
YQTLQPIYLSGPSTNTTLAGSPGTKWIKMGTIQFIGAMIGFIVPMIVISICYARIVVTVKKKVISKKVRK  
DRVAKLAALVVLAFFFCWLPMQIMQLFSALGGWKKIKAFNFDKNLFHAVYPFMIALAYSNSCINPIVYAF  
TTTNFQENIKDICGSDKASRPYKMTLSPPQPGKNGDGKTYATKTEAINMYSPCAPRSNHQYTPAVQVHAE  
QNSPGDLRNQNHLENEKQNGAETFESQSFSYSCPAVMQGLGKINCEQSGADSVAIHSTPLDNDAYDCIA  
TDAV

>ci0100143362

RIMIIVVYMFVVFVGTIGNACVIVMMIVPKFKTPTDIFILNLSFADLLFSSSLIFWAVEQIYEMVWFLG  
VFMCKALSAVTLINLHASVFLAAMAVNRYEFNMLILCKTVRRKRQSSSYGDIKAKVSCV I IWLVA I I  
SSLAWFRKTEIVPSPAGNVTRCLWRMPDTGDRYVWERIYFGSRVLMGF TLP L I V I I I SYVLVVMRLRHR  
QQVTVKSSMQMRVTITEQEQLNKTLFFPVFAVIAAFVICWLPNHVTSI IHALTLGENEEKRDLHTYELN  
LISNCLVAFNSCINPILYAWLNKRFR

>ci0100143568

MNSRALTSTVLTAGRK FSEANYSVGINSTAVSINQLDFDIWEYLLKPTNAEWFVMSLYVLVFLISIIIGNC  
LTIAFILRRKHLRTTINYFMLNLALADIMVTIICLPPTLMVDFMESWLVGQFLCKFTPYLQMAVTSVSSL  
SLGAIAVNRWFVCHPLKVARTRRSAKHALLTMTS IWLFLSLITLCP I I FVTELTEDFPGYKELNLLKSCG  
EHWTTFLHQAVFHIYVTVCYALPLMVMAIAYTNVFRKLSYTKIPGHVSRETNP I PKRRGQCHSCSSNSE  
HTRGSTIGSEPNSPKSNPSSPTAKKQDGASVQEHVRNGIDLMPREQESLFTYGAWKVKRDESEDYKK  
LYLQRNRNSSTFSKLITSRKTQRTYCRKCKIKRNLIQSRKRSGR I QVALVVYFLCYSPAMVLDLIRRTS  
DLFTSVHRESTYFLFAIAHLLVYLNALNPIIYNCFVSVQFRKEFRLTFNCCFSSSSQRRNSVRSTAALRS

LEDTKDRTSCDMML

>ci0100143701

FSSKYELIANPFLRSFVWIMGLFALGGNLASQYLQTFRRYSNPKPGVSSSLRANHILVNLAVSDLLIGVY  
LILLGGTGAFYSGTYCANKLTWLSSSLCDVMGVLVVTSSSETSVITMVL L TSLRLYAVLNPFTSSTRPRTS  
IVLSLIAATWLI S L L L A M L P H S K W L Q G V F V Q L Y S A N S V C I P N L F V K Q T T P S W T F T F L L L S L N L A A F I F V  
AASYIVVYIKSSRSSIVKRNSKGFVPLERKIVRLIASDFLCWVPVSVMGFLSIGGISIPDIAYVISATIL  
LPINSALNPLLYS

>ci0100143923

SITDVYVINLAIADFI FLAML PFW I I D L A A H D R W W F G R T I C K L S S A S T H I H M Y A S V F F L A A M A V D R F I A V  
VCYLNSKRYRYANI IYKRPLNLFKQQLNKCSNLCRTKHGAIGGCLVLWIMAIIMSILPYQFRDLATVNAF  
ALPFVVIVVYIWI AVFLKSRKTSGR L T S Q R Q D K A T V M V L V I I A V F L L C W L P N Q L S N F V Y V G Q G L G F I P A  
GWSHGTAHYI IHMFSNCLAWGHSCMNPILYLFM

>ci0100143990

MNQWLETIMNERKFEIVNSSLQGLLKPDSLGMHDVTPVDTLDGVPQCKDLNPYVLKGDGWVPQHI SRA  
NRSTYSFLCVYMTFVFLLSCSLNLVIVATLKNKVLQRPLNYIIVNLAVVDLLSGFVGGFISIAANGAGY  
FFWGKTMQCIEGYFVSNFGVTGLLSIAVMAFERYFVICPFGPVRFEKHSIFGIVITWVWSMFWNTPPL  
IFWDGYDTEGLGTSCAPNWFVKEKRERLFIILYFVFCFVIPLAVIMICYGKLIILTLRQVTKIDLYSLGG  
TSPEGEVTKMVVVMVTAFFVFCWLPYAAFAMYNVNVNPEAQIDYALGAAPAFFAKTATIYNPLIYIGLNRQF  
RDCVVRMIFNGRNPWVDELVGSQVSSTGSQTLTAVSSNKVAPA

>ci0100144199

VFGVILVGLVGNVAIITVIKREHKLHTRANYLIGSLAMADLLVSLLVSPFSVAVMTLHEFTPNLYFVGGH  
VMCQLFTFLDVTCTASILHLCAIAHDRYTAVTKLQYRHRTHFKKVLPCIVLIWLAAVLLSVTPYFVFP  
PTTGAKENPTIYRIVATTIAFYAPLVIIIAIYWRVARIAWTRIIHSGKKQIMAKNNNSPPTLQRTAMYN  
LLRRNSLRHTPRHEQHLQEAFCVLSLGFPRNVTKRRFSDASDVDKNIYRNDVSKVVPNQFTEKTLKRS  
HSHSDVPAILITADDASGGYPKARNESPQHRVSSSKSEHSIIRTGMVIGAFVACWLPFFIKELIVPFCG  
EQCHLDPSLEVFINWLGYSANALNPFYAFSNEEFNKAIRKLFWRNRRR

>ci0100144368

EMIGNPFLRALFWIMGLLALFGNLAVFLVTIKQMVKPVNLPVKHACLWFWANLSLSDFLMSVYLLAVSIK  
GLQFSSRYCYHDQEWRRSSQLCSILGALVVIISTQASAFILTAMTTFRLISTFNPFLTRAVSRAWYIMPVLV  
FWCIAVILGMFPLLELNSVYFFNYGETSVCMPKLFVKVGEDTWEYSTFLITLNFALFLYMVFSYIAIYR  
RSISMQSKRSGSQNKMKQKKITRLIVTDFCSWIPICTMAYISLGGVEMNNIVYVISAVALLPINSALNP  
ILYSNVVENVIKKLCKKRNK

>ci0100144441

MKCVYWFNNSEWLTEGCCLDISADPPECLCNHLTNFALINTDVVTADVALDIIISKVGLALSIFGLSITI  
LVHLLSRDVSRRPAKVLMOICCNLLVADLIFAAGVSRTEENREACFVIATLLHYFLLSTWCWMTVYSYDM  
YLSLVKVFVVGKATRVLQKFTLFAYLTPAVIVGTNLAIAVGGYDKQNKPLAASTYKADNMWLTGYSLY  
LGFLLPVGLMLMYNFTVFMVVFRELNSNGKAQTNQIKRDYKQTLTIAVTMSMVMGLTWSVGYLLLLSDN  
KTYLLAMSWIFAILNSVQVNTSIPKLEVINLKQ

>ci0100144493

MLYIDDSLFPSSNVTTVEIDLGEVFTGLQDPVKIEHYDKGGTLYGQTEXCEYWDFNKNDSWSEGCCF  
NYTSNPPECLCTHLTNFALIMVRIKKNNAAPADLALSVIDIGCILSIIIGLFATIVIHAEDRQVDRRRR  
PTKILLNICGNLMIAYLIFVVGIDHPKQKNACIAVTYLLHYFFLTSWCWMSVYSYDMYMSLVKVFGRNEH  
NFLQWCSLFAYGTPLVIASITVGVTVGYLDNLPQAVKNNLNICWLNCPALYIGFLIPITICFVGNFAIFV  
CVLKEIEKNSKVEVSSMKRTVKQNMIFAVTMTSIMGLTWVFGYLLLLSDNEAYLTAMSWIFALFNTLQ  
VGIFVLTAMRRPRFRKLWKNSTSAVTSSEHALSVFRGTDTLRSEDASTATTDMMHRE

>ci0100144713

MNAFTFIYILTFLTTFCGAFKCSSTSNEAFNDSYVCDGKVDYDCSDELTCGINTKFYPCPNGCVALLPL  
STCLKGKCPRFCDGVSQCSGSDGDELKLGFGKCVVQTFIEQSANRCILPQFYIKRWESVNQPRETICAA  
GEDKACYDVTNDDVYFDYQQCWQCEDSTVIQRQQICDGVFDCQDLTDECLCEADDVTLNGVCDVILSNKH  
KCGLEEVPCMDLSHCINKTSICNGIIDCVDGWDEEDCERVIQTTERISNYECQGGYALDETUVACDGRPD  
CLHLDDECSRTCEEYCNYFLPLVLRKFSNSCIIHIDELCNGMDECYNGEDERHCPFLTPCSPNNITMGQ  
YDHIFQKCDLILHCENGADELSCSNSTHFYRDDNTTIIISVRRVYDGVFDCSDFTECSFSDTSISSVTMM  
IKEPALRACVWIIILAFALAGNVAVIIKTAREVWVILRGSKSHSVNKLKLIHKTMVLNLSVGDVLMFYLCI  
IASKDIEFSNEYCKHELKWLSSATCSVAGILSMISSQSTVLLMAMMTYRLHGVLRPFRTEGVSIFKLLL  
VLLFIWTVSAMVAIIPITPSLQRI FVSKYVLNQPFIKNSSITLTQMQLVGLRNLNLSNTKYLLDQYNPVG  
SFQSI FKENHNHLSQTSTGVLGFYSSNSVCLPKVLWMRITSLIFTDFLCWVPI CIMSLLSYRGVMLPGI  
VYRFAAIVLFPINSAFNPWLYSTVPVFPKLNFRSWFNKRRKVFVRYSVKTDGQNI PAIQMTAIHQLOVPTS  
LHHQRNLKTQEFRVPQNNLTTIWSCFSVRPFTQGSTNDLVGSSICLSSYNRSADSATVATEI

>ci0100144874

PWTTNAARVLSRKKPPQIPRPTVASICLYMIVFCMAMVGNILVVVTLALNPRMRTVTNCFLLSLAVSDDL  
LAVCCMPVSLVGQILKRFIFGEILCKAIPYFMAASVSVSTFTLLALSLEYSSICHPLKSRVWQTRKHA  
KVICGIWISSFILVSPTLVFSNLSNIPVIGRCS PACRMTFPNRI TNQAWYLFLLASMFCIPGVVMIMT  
YTKICWDILNRFKLDSSFRNTAGKKMNVGTTPIFPRVTGQRQEFECNTSPFLLRSKREQNERANRALARW  
KAKKRVIQMFIVIVVLYFVCWTPLYVINAWRAFEKRAMFALEGSIHIVHLLSYISTCVNPIVYCFMNRK  
FRDSFLYVFLCC

>ci0100144925

MDMLCLISGNSVYNRSVKHVDVPIPIEFIAKPSIDCDVIQSEFQSLNVAVTRPSFVCTKWFKQNETLRAFA  
FYGDQCQPPDDCQEHTLESTDDVSFHSVGYQPLTFILIWILAITAVVGNMMVIYNCFRKFAKKFRSFTEN  
EKIHVWLVTNLAFADLLMGFYLTFLFAIAHYYQYQYNLDERYKWL SNRWC FVMGVVSVFVSCQVSVTLLAI  
ITTYRLRSILCPFQSRNPQFKCAIITTVITWTSWTFLSVLPLLNIEPIHTVFNNYVQPYFVQCPEKSDIH  
YTSLFQTLKQATEFAQANCGDVVRNVI SLPPSPTWTEMIYVGQRLGIISTDSSFSYFGFYNEQSVCSRY  
FVPFSSRSMPTMAIITYNLILFFYIAIAYIVIWKHATTSFSCRQAI CLFGNNKNCDESTRRNKREQDNF  
SLQRRIMVIVTDFLSWVPLCCLSVYYYVIETSLIEQSGCDYQEYTKGWTKIFSAYTFVAIPINSSINPFV  
YSTSYWRDVRSRVRIYSTKGGSPASEALDGNQL

>ci0100145160

MGSWKVLTNELAVTDIPIEQASKPCVQVAFYERDAGGYGHFHEVIQPFLLPFCPFICWGFDERFVLNGKAS  
VWNCMPHSCRVNIAIVMAVSIALAIIVILVNGIVLAVLCTQSKMRTSQGIYKLSLALADILVGVIVFPTF  
VSSLYKYQIVEHNI GELANVTGYVIKERATEPGQIATMSMRSTTGHFRAQFSKSYLNFVGFFTILSLTVS  
ILTLVAAGIDRFIAVFRPTKYKQNIATPIAVKVTVALWALSFLF SVLPLFVPALS YTLVASILVSSAGPQ  
VLVLYAFAFIVPLLLMVLVLTILTFTATRSYKNSWKRLSTSDDRKAHGINEARLARTLGVMVGVFTLSILP  
SIVVLICGMFMSNIYPNLKLLSPTATTGFTSAEVVVFILMCNSIWNCFIYSIREQEFRAAAQKFFCR  
KKSGQPNLDETLRGLDGP IASEVFQNEEYLDRTVFTEINLNQDKNCDDSVTTAV

>ci0100145235

MENITFIGSEPRSTSPVEIATSIACILAI FVNFCVLLVIYIGPRAFRTPTFFFISSLATADLLTGITILL  
AIFLPVSDHSWERIVLKGLAVVCFSSASVNNLMVIAGDSKSYLIVGVSYFVVS LIAMVGLYWAIFASVRRR  
AGSKRHRNGSVVGPVASRGPVMIHRRREIRLAKTLVIVMGVFFICWLPVVTLFVYDVIVDDKRLIVWFD  
YCLASAVIHPLANPIIYSLRLPRMWCKAVGRPRYPRSTVYDTVQKKLEERRICQLQLRYQTQAQKEHRQT  
EVMCSYTVASHACARPCIAARQLKWSRNETT

>ci0100145252

SSINISKEEERNRLCHQSYFNLLL PETKTF CPGIFDGYICWPHTPAGQLLEPCPSYIEWKVNIHLQESL  
VAYRFCEFDGSMVRNDTGQSVHLDHLRGDHR TKMYVGN YLLLSIIDIVTKIYTAGYIFSLVCMVIALFI  
LMFFKKLHCTRNYIHMNLMLS FIVRYVAVMVKDKVIEDHYAVGRPNLTQM EMSQY CDDVAGTDGLMVSCR  
LVITLMHYATIANYFWLLAEGVYLQ LLLV FVMTEYKYFPIFMAFGWGATWIPIGIWI AFRITFENVGCWE  
VNNMIP IWWILRAPILISIAINFII FINI I RMIVSKLSANNMTRSDYKYRLARSTLALIPLLGIHYIVFM  
GVSDSVTDNSAFINTKFAFEIILTSLQGSIIAILYCFLNGEVQTEIRK CWRNWRWSHRLPAASGKFSTYR  
SDVQMTSITYAHSMDKGDAHETSLLSPNNKHDHVDNKRSTASCVSDQQT KIGDSSRLMCNGNGSPSKQL  
VV

>ci0100145264

MLESRLQDTATLCTCKHKEAWCERLATLGTRFVSPQFRSVGSPSPFTRLNTAVDNIFMQIIKLF RSYLWTN  
KCRGSGVALTFLAMLLASDMLVPTSAVRYADNGPSLSGRKPPISGLSGRQGTGMCEPIQVPMCIDIGYN

FTDMSVSPSYIYDQKEAAQSVIQFGPLTKTKCAEEMKLLVCSVYTPICIPGYPGFLPPCRFICEAAKAGC  
EPILKKYDRTPNLFDCQFPDSQGNPPCLHFNRSATEEPAVPRITITKKGESKTTGGPVASVTHHPYK  
PINGCPCACARRMVKITNKKDPLYGKVTGGVPNCAMPCKSPYFSEEKRFKFAESWITVWSVVCFAITMLT  
VGTYLIDTQRFAYPERPIIFLSACYMFV SIGFIIRVVAGHEAVACAWHSDRVLYQTTGPFLCSIVFLLLY  
FFGMAGALWWVILSLTWFLAAGLKWGSEAIASYSQYFHAAAWLIPALKSITVLAMSSVDGDVLSGICFVG  
NQSTKTLRGFVLA PLVYALGGLFLFLGFVNLFRI RTSIKKVGKKTDTLEKLMGRIGLFSLLYMVPSAA  
LVACYFYEQQNRELWAKAYNCRSFHGRDRCSHGANGPEFAVIVKYSM TLLIGITNGVWILSGKTITSW  
RKFYRRCYGCCLCGKYGLKAKQEGEPLAADDMSKASDNSSGKRTKSDKASDKTSPEEIPLTNSVATSSFTG  
NPHSVGGSDSKE SRSSSARKKSKTQSNQVQHNRNDMYE CNEVDRNDVNQIRHAACDCDIAPCPLPSEVR  
GNPAKQLSFPEGFETLPDPLNVSTTELEAANRVQIH HHHHHHV TQPPCSCGCHASRVTTTRPTPRRHS  
HDPGACYEANHRKLVLT PPAYRTSPTLTLPLAKAVMRFFCF SVNTQHCTPFVYAR

>ci0100145281

SSINISKEEERNRLCHQFYFNVPLPETKTF CPGFFDRQICWPHTPAGQLSTEP CPSYIEWRNESLVAYR  
FCEFDGSMVRNDTGQSVQVWNRIQCDVATNGLQYELGPLEGGPKHNDIYTAGYIFSLVCMVIALFILMF  
FKKLHCTRNYIHMNLMLS FIVRYVAVMVKDKVLEDHYAVGQTNLTQM EMSQY CDDVSCRLVITLMHYAII  
ANYFWLLVEGVYLQ LLLV FVMTEYKYFPIFMAFGWGAPWIPIGIWVAFRITFENVGCWEIYNALRTWWIL  
SAPILISIAINFII FINI I RMIVSKLRANNMTRSDYKYRLARSTLALIPLLGIHYIIFMGVSDSVTNSTI  
TKTKFAFELILTSLQGSIIAILYCFLNGEVQTEIRK CWRNWRWSHRLPAASGKFSTYRSDVQMTSITYAH  
SIDKGDHETSLLSPNNKHDHVDNKRSTASCVSDQQT KIGDSSRLMCNGNGSPSKQLVV

>ci0100145358

NTNNTSCGNGSFSCANGNCIHARFVCDHND CGDKSDERGCRIPLSANVSFIQCRNGKCI AFGLACNRKD  
NCGDGSDEIRARPGLKCSFGKRDEL CVLPQMYVCDGVFDCFDLSDECLCEMPQIPDVCDNICTRRKGCK

RGTFQCGDALNVTNVFKKVCDDRIDCPNGRDEQYCRMGTHQTRVVACPADPKNMTIKTANLCDGKPECYD  
LSDECGGVCSIEQAFCKFQNIIFLNHYDKALVCDGYRDCADGSDEWYCPQRFNCTSSIKPSSVPRFTFTFDD  
FNDCVDGSDELSSRNEMISVIFFRVWVWIMAVMALLGNGYVIAKTCQRAKLLKASAVAKANHFLVFNLA  
VSDFLMGVYLICIAIYSAVFSGRYCYEDEKWRGTGSSCQFLGGLSVVASEASVLILAVMTCVRLYSVFMFP  
RSRNLKFWTVSICVMIVWGLSVCLAVLPIIMGLYGYSSSSVCISRLFVTPLQQGWRISITIVSINFFVF  
VFIALAYLAIYKRAKQPRKNDTDRSVKMQSKIFRLVTTDFFCWVPICIMAFIHFARVANLDGTAYVIVA  
VVLMPINSVLNPLLYSNALDNLLKKTLLAWRASRQKAALLQGEMFQRFKLQESAGTSDKAESDNQPESIH  
ATPVRTADSKL

>ci0100145437

MESYPSQIVVPIVYICIMCLIGLIGNGLVMFVIFGSKEMTKTVANIYVWNLTVADTLLLVS LFPNSTQRL  
LLNWPFGSGMCKIVETVKYLYNFASVFFLTAMSIDRYIAVAVVTSGRWRTRSNTFFVCAAIWMVSLVIV  
IPLL IHTKIHGDDKLNCKHPDSKTFHAVIIFTFVIGFVIFPIIIISACYIMIIVKLQQPSGAKTRSRQAE  
RTRRKITRMVVALVIAFFICRLPFYVWHLVLI PGVDVSPGVCHDVRDFTFCLGFINSCLNPILYTFGLHN  
FQERLRKISISLSHSFSFTNFTKFTTNTVSRAETAQAQSKKMDTSHIEVEPIVKTTOPLYHPVREEDLILA  
GEKPATNGANATLLEEREK

>ci0100145494

GNRRVSNLSEPVKIVLTHNSSLQARPGFPCVFWVPSVSYGYWSSNGCNVNHTSSTQTVCHCSHLTNFAV  
LLDVYNQNNNLDPTHELILRILSYIGCGLSVTGLLITLLSYIMFGKIKRDAPAKILVCLCVSLIALNLFY  
LSLTPAYYYNSKSCVAVSVLLHYFLLSALTWMGLEALNMYIALIRVFNTYYRKYILKMSLVGWGVPLIIV  
VIALCLHFLTEPVYIPMDDYRICWIRKEVYFGCLVAPFALIFAFNCIIFCLVLAQLLGLRSRKLKHRDSR  
KNHKKSSKHENGLMALLGITWGLAFLSIGKASLPLSYLFVIFNSTQGFVWFIFHCVLKKDIANIWQKILT  
CQGYDKSNKSGSKRWRV

>ci0100145584

FCPSMIDGLGTCFHQSKSGQTASVSCLEELNGIPYNTSDTVTRKCLEGGRWENRSEYNCRPILDEKQPC  
IHFANVVKISMAGRGLSLFTLIVAFIIFCSISYRSGCLYIIHWNFVMSLMLRNVLWICLYLFMGFSNNEN  
KTIICPIIMVTVFNYGQTTSYCWMFLEGIYLRHYVAIQLGNDKLSRFRFYVTVGWGFVPLIMSAWAATKSV  
LETGTCWLPQGSLSNADYIFKVPVLIALLINFVIMINVIRILVVKLCNPPARRPADGSSIESTHYFKTAK  
AALVLFPLLGLTYVLFIIISPGYGTGETVFLYFNTVLDSFQGFVCLVYYYAHHDVQVEVSKKLR

>ci0100145837

SQSFTWIYTAGGICQATVDSMGVCFQTQTKPGRVAYSGCPTILNGINYIGNSSKECYMNGTWAIKSNYDSC  
IHRLSQKEICKYHFVSWTVLTIVGRSISLFAFCIAFASFCILRRRNLKMIHWNFVMSLII RNVTWFLLF  
GVGFSGNVNMVGCRCVFAILFNALIVTFSWMMVEGIMHRKLESPFMSMADSFWGRCVLLGWGVPIPIIM  
FWAILKAKFENKDCWLNHSPKQVDYIYLVPIGIVLLINGFIFCNFVCILAKCRGRKAAYKHRNEASTIRS  
VSKAFVYFSLGLTYLIFMVNPSNSSTGEIIFIYTNVILESFQGFICLHFHCFCNTHMREAVLRRVQTL  
RAHGNFPCFGIGIGKSYYYCI

>ci0100146266

MLLDCPPDASVFIPIYLAIAVIGLMANALVIYIILILKEYKKTVTNVYVQLAIADFMFLFILPFEAAT  
KLNGEWIYGTAWCKITESIRMLNYYTSSILFLTMMSVDRYMAINHAMSSKAAKFRNTMAVGLISATIWFIG  
FLSVIFILIQAKVQDCKNIEFSRKFLIVWFVCFNFFLAFVPLIIIIILCYVQIIRRISQPMAIGKRVTR  
MVTALVSVFIICWLPYHAFNMARANDS QLTKNVCMVHHTLVLAYSGRYDISNAFFLQKACMLNPFVLT  
FLGTNFRKRWHSATRTRSFPSLGSRSAGEYTHGSGRKSRLVL

>ci0100146328

VAVSLLIVTIVGGNATMVASIVKFKLRTTQNI FLASLAMS D L L L G I L V L P F S L M R E L V Q H W P I G R F F C K  
VYLAIDIFLCTASIWNLCSISINRYWATTHGIKRYTSKRTQRAIVLVIFAWVCYGICVFLYTRHTRCIHG  
SHAIYLINRYATQAEDECHHSTETWYILFSVSGSFYVPLFIMLITYGKITVYLYKQARSNGVSYSVLTCL  
YNELPAVVLYGFISIAMRRQKRLNLMIGIILGAFVVCWLPFFQTYVTQTLCPCCCLIIYLHNRFAYCN  
SAFNPFIIYNLNNTKLRKAFKKIL

>ci0100147063

MVDLVAERKWNYSVYEDDLYGIRGNREVDIAAKKRGCIAVSRALPRNPTTG DYKKIVNDLINVNKAK  
AVILFTKLNDAEGLIKAADENPQSRGRFLIGSDGWAGQVPSQRFKFTYIASLNQSLTFQPKRNIITNLR  
PYMTNLTLANHLNANKTPSTRNPWFAEYLASKLKCQLPGSIVNSTVRMCTVNDKLDPATYTTLAKMQSVA  
DAVLALAHSLDNYLDRDACKGLPGLCASVRKNGTKLPQNVYPYIKNVTLNGINNNTFRFDANQDGAAYDI  
ASFLGEQKWKVNGIYQNKIRVLLRFNKVIHTRCFSIGISWYGRYNDTIDVTSVCSQPCKIGEARKIESS  
VCCWQCQACFPQYVSSNGTECMSCPIGQKPSANKDACVPLAIRVLQYDTPYAIASLIVAGLGILMTIMV  
ATVYYTRRDTPIVKASGKELCSFILLGSLMSFANAFVLCYPPSDTTCI IARLFLCFGPTIIYSGLLTKTI

RVV I I F Q S K K V L P P E V K M F L R P T Y Q I I T M F A F T L L Q V L A V G V W F G V R Q T P A E V I F P S S S V A F R S C K D L E D  
V S V L A G L V P P A L L M L A C T V L A T V N R N V P T G F N E T Q Y I G F T M Y A S C V I W L A F L P I Y I T N T Y N F G I K I A S L S  
I C L S L S A I T V L V C L F G F R C Y V I L F Q P E L N T P K T V M S S T A R P S S I Q Q L P S N T D A N K T P N N L T T A N H Q P Q S Q  
N S V Y N R A P P S T S S F Q M T P I E N A K L

>ci0100147271

M N N R L D C S D G S D E C P D D L T E R Y M G M V S S N Y D I I A S P V L R V F L W I F G I I A T V G N L L R S I P A S L R K G Y S A S L  
R T N H I L V L N L A I S D L I M G V Y L I V L G S M G I K Y G G K F C A H A K H W M G S G T C Q A L G V M V F V S T E T S V M I M V T L T  
A F R L Y A V Y K P L K S K F R P P V G V A L S I V S F I W I I S I V A A L I P A M P P L Q R F F T D T V L M E S P F F R H G D V S F A I A  
K T F V L K L L T F D P A A V N L T T V Q V N M A R T A T S W D D L E S I K F A T K H G V D L Q D M Q Y Y S G L I V T D F C C W V P I S I T  
V F V R F S G I E V P D I M Y A V S A V V L L P L N S A L N P I L Y S D F V D G I Q T K V H R K F A E S A S S L Y R R S R T L S L R P S I T  
V E T N L

>ci0100147407

M K Y F L V I A A L L C Y V T V L N A E S K E N S T V I A A T I E L K S N S S H Q N V S E H Q S P E C V L K P R V P G Q R V G S R M T I P V  
I T F T A S T V G N T I A I F V I W R N Q K R S D K K S V F Y T L V M S L A M L D L I S T L V T S P V T F L A Y N N N Q C V M D M G G K P L  
C E Y S G F A M I F F G T A S M A V V F A M S F E R F I A I R F A F F Y H V R K I L T R S M I I G I N A F F L L L S A M P L V G F G Q I Q Q  
Q Y P G T W C F I D W K S H I L A V L G T L M M V G T V V S N L Y V V V R V I I K R K K M R I R N S T M Q V M S K T R L K K I A Y D E T Q M  
M V L L G V M T C L R I L I N Q L S T I Y S P E A D N S T T I L W D L F A V R M A A I N P V L D P W V R S S N A N N T V V V F L T S F V G L  
Y S L P A L D D G K V W K F N E D V V H M

>ci0100147431

M G S A A I V G N L S V F C Y S I K Q L V T T K Y K N R V Q M S N D W F I L N L S A A D F L M G I Y L I T I S I K G V H F S G S Y C Y N D L  
E W R T S K L C N T L G V F V I L S T Q T S L F V M C I M T T F R L M G V I C P I K L R N V K F R F S A L S T A M A W I T A T V I A I V P V  
L D L S G A F E V Y K I Q G E T G Y F S D T S V C M P R L F A K V Y E Y T W E Y S L F L I S L N F T M F M Y I L V S Y I F I Y K K G T K M K  
S K S K D N A R S M Q S R I S R L I L T D F I C W V P I C V M A Y I S L A G I D L N K I V Y A V S A G I L L P V N S A L N P I I Y S K F V E  
D N I K K A L K F V T R P C T R K K E N E

>ci0100147526

L I A Y I V A E V L I A V F A L F S N L F V L I A I I K F K N L Q T S T Y W L L A S L S V A D I S V A V L G I P S A I V L R I A V D R A T C  
L V V V S F V I F L T Q V S I W S L L L I A V D R F V A I H Y H L R Y R A I V T S F R V K A G I V G A W L G G A F I G F V P Q I G W T T P Y  
N N E D V H G S S E V E R C A F E Q V T S M E Y M V Y F N F F G C V L L P L A A M F V L Y F M I F R V S L K I K K L I K V I I K L R R R S K  
L I Q K E F R A A R S L F T V I G V F A L C W L P L H I L N C I T L F C P E C R R P N W L I D L A I L L S H A N S L V N P I I Y A F R L R E  
M K V A F Q K L L R S F S N R A K S A F C C E R T R

>ci0100147570

M A Q V F L Q T S S S I L I T E A K T V T S S T T A V N N I E N Y A V A M T T T L L G N D V I N N N E R H A E V V T N D V T I T S C Y E D S  
S N S G C D L I N D D V T I S T T S S N Q R R F V S Y V T Y G S K L G F A N D V S F Q G A T S S L T S N I V S M T S H D G E K S F D D V I V  
N L T F Q G A N A C G F L T T S G N W S D S G C S V T S L N V T H V T C S C D H N T S F A L L F L H S D I Q F T A E E L E Y L D I I T Y I G  
C G T S I T A L M L T I F T F V Y L K L T R V K R I I L H M N L A V T L C L G Q I I L L I G T K V E P F C K V V A V T L H L L F M T S F S W  
M L M E G I L L Y F Q S V R A V K G D V N F T L M L G F G W L L P I V I V G V S L G V G F D G Y G V D K G C W L S V K N G L T W A F I G P A  
L G F I T L N I I M L A M I V R V F L K L K M N A K S G E W Q R T R R A V K A I A F L T P L L G L T W V F G V L A V S Q S T K W F I Y I F S  
V L N S L Q G L T I F V F H C L R N E D V R K A F T K K Y K R S F R N T S G V F S T V T P S S G P D S T F V R T T A G F T P R I P H K V L L  
H T M F

>ci0100148112

M K S Y D R Q L S I I P K N E D E T F T G Y P V D V T T H C P C V V Q T T S A Y K D D A S I I Q F D F I Q N D F C D C K R T R L P D I N D H  
I L G L L L M I L V A L I V L T N S I V M V S V C K I L H R S S A H T N S R R L K I S C I F N F N L S V A D I M I G V A A M I S L D V Q G G  
R S F S I G T S Y N K C L I L I T N C T M P C V W S V A S M T T I C I N R Y L M I M H P L K Y D I Y L N W K R A L V I V M T I W I T A C I V  
G Y S P L M G W N I S E Q E Y L K N G S V C S F L Y I V D P T Y V A F L C I G T F V P Q V S L V L Y M Y F K L Y Q V T R K H G C A I R R C I  
Y W F Y P T I N S M A D I R A L Q T I A L M I S S Y V V L W G P F L I V S C M Q A F C G S S C Q L Q L L A G S Y M F F L G I C N S A V N P F  
V Y T Y T D R S L R K E V S M Q Y K K L K T K K N S L R R C L H T

>ci0100148288

L V L R H S F V G K L T N Q K L A E V P N L F L L K L V N M T H S E I Q S G T F D N S Q L R I L Y M N S A N L D D D S I V F K L Q Y L L V L  
N L D F N K L T K V P P L D G A P F I R L L S I S G N R I R R L G A R A F F S V Q S T L R I L W L S N N M I S V V H P D S F Q G L I S L Q H  
L D L S N N C I T S L E N G F L N E L H D L S S L F L N G N N I L K V Q L C L T A V P N F I K K C S V L V S L D L T N N K I L I I F K Q D F  
M Q L S N L T M L K L Q A N D L M E I E S G S F N N L K Q L E T L D I S G N T Q V V Y D N N L L S E Q K K L K R V Y G N N F R I C C L A R K  
T S P S L L Q C S P E D P I S S C D R L I A K D Y I R A L I W I Q A F I A I I G N A M V A V L R A R E Y P K Q E S R G G K V N T S F V G V L  
S V A D L L M G I Y L L M I A V V D S V H Q V E F F A F S H I W R H S G F C R F C G F L S L F S A E A S V F T L L V I T F T R M V S I V S P  
I Y Y L R A N L R I F R I A M L L A W T V A L I I S V I P V F R L P N F F S Q T S L C L P A F Y T S K R D S D W I F S L F V I I F N L V A F  
F A M V T S Y L V I I I A T Q R S Q T R S E N R R S S N P R P K H N L G R R V F L I V A T D F C C W I P V C I L G F V S I G S G G L N F Y N  
D V Y P W T A V I L L P I N S S M N P L I Y T F L T R Q S L C Q A I N Q I R T D T G P R T S S T G T G K

>ci0100148347

CVFWDFTGSDWSSEGCGLDVTKQPPTCECSHLTNFALLVSIHPLPPDVVLNVLSKIGSAISMFCFLATAL  
IIVANKEARKQSIMIVHLHICINLLVVYSFFLFGVSATNNNNLCTTITITILHLAFLTSFMWMAVATNNNN  
LCTTITITILHLAFLTSFMWMAVYSNKMYFSLIKIMAGVGEDYLLKASIVAYGVPVCIVGLNAGIALGHQQ  
GNDVMSSQTYKSPQICWLHGKSLIYGFLLPVGLVLTNNLIVFGLVIRQVVFKTTKIRSTAKKRTKQQNIM  
MSCAMSLFLGLTWLLCYFMLLSSNEVYQRILNWLFFVSTSVQ

>ci0100148350

MVICSILAVAIVVANVSVILVFMNLKLRNSQGVYKMSLACSDFLVGVVVVPSIPVSLNMRLNIPEVMGM  
SYNASNLSVQHDIRFDDVPHLPGINTVYYRSYLNAIGFFTTTTFIIISIYSLMMASFDKFSIVRKPLAYSK  
DGAKLLAIRATVILWILSIIILGVLPFVGRSLRYGLLASTLISTSGTASLSLYVVAFAFPLIVMWVLSIS  
TFVMTVRHNNRTRKLVASKNKTLSSRTEIRMARTLGIMVGVFTLSLLPVICVILASLFLVQIYPQRILTF  
KSYDFSIHTSFEFFSAVILVCNSLWNFFIYNGRNDDFRMANKNMYGSLTKRFHFRTKISITSSDSAPKTV  
GRRTFTSETSKQNSQRISQQTIPSTPPNGKKDFSTVQSDNSPMSVLVTSKV

>ci0100148371

LNLYVFRALRTRKTPVLLHISVCMCLSYITFIGTINLPHLEYVVCYGGTIFLHYLLLATWGWTVCVNALYM  
YRALVMVLAADIERPILKGGIFAYGMPAVVVATNALVTLLYFDNQLDKTSKQNMCLNTYSLYGFAPV  
GIMLLFNITMFYCVLRKLTWGRQQLQSTAGVQTAQDQLQITLLLVIMMGLTWTIGYLMLISTDVVYLKIM  
SYLFTIFNVLQGLMMFLLNCVTKKAIRDMMWPKCDLHCLDEANFTYCCRHSYSDVTEFQSRGTILTST  
AAESSAAGTSTAGRYSVQSF

>ci0100148400

IYTDQRCNGHNDCGDWSDERNCSHVCKSHNETACECHLNGTCDISNYVYYWPCFSEARRCNGKNDCGDW  
SDERNCTRICASHETEACANANGGTCPKFWGYHKHCYKKNKYCDDDRDCEDFSDETNCTCGTESVKCGCI  
LNPNNCTSESLLCDGVPDCNDGSDWEWESICASRFYCKNKQPLSVSRDRVENGIKDCSDGSDECPVSSI  
NHVFSSPFEMIGITFFRVIFWVMGFIALLGNIIVVFTASVLELKTGVNSDPVKTSFLTFLINLSVSDSLMG  
IYLIAISGVGVQFTGSYCHHDAHWRSSSLCSFLGTLVISTEVSALIMASMATFRLASVYFPIKMINAKQ  
ISYVIPSACAWVIGVLLACIPSMSQSGYFVNTLCATSVCMKPLFVKTEGDEAWEYSTFLIVFNFIIFYI  
ALAYACLFRRSNAVIKGSNKSKKLLQTVSIMILCNFCWIPICLMAFVSLSGVQLDNIVYVISAGILLP  
INSVLNPIIYSKVALTTIRRLFQKRTFTSQ

>ci0100148454

VLSILIWMSVLAIGGNLIVITLTLCTLWKSRSNHLVLNLAVADFMMGIYLILLAIQNAKTNGRYCYVD  
REWRSSSTACSSLGTAMTSVQSSVMFLVILTTYRMVAVLRPFRADYMHVKYTIFFIVSMAWGISLILAILP  
HMNFVKGYFGFYNVHSVCLPQLFVTVNDSAWAYSAIMTFDLIAFLYILISYLVYHDARRSAAMNRND  
DENRIMQARITRLVVTDFACWGPVCMFAFLNLLGVDPDVAYAFAAIILLPINSALNPILYS

>ci0100148475

STKDVVFSSPFEMIGSTFFRVIFWVMGFVALVGNVIVFISSVLELKTGVRMEPIKISFHAFLLNLAVSDS  
LMGIYLLAISGIGVQFSGSYCHHDAQWRSSSRCSFLGTLVVIISTQVSALIMAALATFRLISVYFPIKMKY  
VKKSSYIGSAISAWVIGVLLGCIPSMSQSGYFFGYFGATSVCMKPLFVNVGDDAWEYSAFLITFNFIIFYI  
YIALAYICLFRKSRKSLNKRKMSKLLLETVFTMILSNFCWIPICLLGFISLSGVHLDKIVYVVSAGLL

LPINSVLNPLIYS

>ci0100148961

MEIDFGFARTVYGVALLMVFITLLGYAVYFGAIWRSKTLQTRHIWLTSLACGDIIMMVHLLILESSLG  
MGHRPRQNFECQVGFALVGLFSGYVTIASITWIAIDRYRQCKPEKVGVNCFYVIVWAMSFLAASGPAL  
GFGAYESAEEENTVKCLIDLNKKDTNSRLYIILVSAVWFVYFVKMILYNKLVQEAKEPQPMFAVPLTF  
FLCYLPFAIYASLKITVGLPPLNSMVVASIYMLPKVISVNVNPLYMRSDEPELLAACRHVVGLTDGKKA  
>ci0100149095

MTARIPTLSTLSTIMNGSFTEDSHVLNGTGCKQSEGNAIHVVGITILSLIIIVENALVLMALTMERRRFK  
LILFVFINSLAASDLLSGIVFLYTFNLDLLESLLEFTASAPSWVFRKAFLIASLLVSLGSLQLIALDRFVS  
VAWPLEHEKFISSRRRAVILVVLNWLGAALIAPVAGWNCVQHCVETATLDGSPNCPHPSCSRVFPFIT  
NDYIITLKSHFARMAVTRKSAKSKREEKNLAVFMVLVFFVILCWMPSVILLCIDSSMPSVRISSDLFDI  
CSFPALLNSIINPWLYAIKLSKRTVLVQWLCRCMKQEKRDKIFQINNSVPSVVATNNRAYSVNKPCIVV  
QSDPSPKPTNVAMKADVSAANHRMELKPLQPNVGEFQNVESVRSYCSDSG

>ci0100149471

MLLSLSLTFLLFCYWTGTMYIIEGSVYKYKTKETLDELVGLRPNPAIVPQQRDARIYRVTRDVGQDTGNL

SESYGGASSNFSGKSQQLNLLPIAFNVMTNITSTHDPDRMVTDVATTEDHHEDEENPFAQSPYAIFGW  
SVVYGLLVVVALVGNLIGICWIVIRNKRMTVTNFFLASTAFADSNVIGFNTVFNFTYALNNDWYFGKAF  
HFINFVPIGAVLASILSITVIVSLDRFVIMYPLRRRTSRKTAKMTIAGIWLFLSLGVAFPQCFFATITTEE  
SGTRTTCSIQWPDGVSGRMRYQLSFMVISYFLPLIILAVSYVAMALRLCGSNNQVGHQNETQLRRIANNK  
KAVRMMMLVVVFAICWCPYHLFFLADYIVSDSYHWEKIQQVYLAVFWVAMSSSMYNPFIYCWNNSRFKE  
SFRELFHCGGARGHRSAFRLRQRSRGA

>ci0100149551

MLSIANSQKCDAVYPPDCLDSSDEINCS DSTHFYCESGTPFFVRRDQVVDGKRDCADASDECPPDMFQTN  
ALSSREELIKVPFLRAMVWMAFVAIIGNCVVFILSSKSLIKNSKKAKNARAPGVVINKILILNLSIAD  
LLMGIALLIIGIKSAQFSGQYCWDRDLLWRSSTTCDVIGVLSVLSCEASVLSLVCLTSYRVYTIYFPLKSR  
TVNMKVAIIWIMCIWVVCFILAFPLVDQLSLGYFGYYSASAVCLPRYFKLPTDQFEVNAISPVIMSFNF  
IALLYICAAYAAIYKRTYSGNMAVDTAQRQQTEQRQKNAKKMQRKISILILTDLCCWLPVCLMTFISLRK  
AGLHDSVYSFSAIILLPINSSLNPIIYTDVAPKLYTKLKQIGLQVRTLNVNVDKTQIPSTTETPNVTTTTSV

>ci0100149830

SDWMKCDGFNDGDSWSDENDCISECDTVNHKPCDCFFNGTCDRDKKVYFWPCYQSLYACDGWNYCGDWS  
ERGCNFTCGRDEFQDCDCDKNGQGCPIGSDYISHCYKQSDICDGYPLCTDWSDEKNCTCEPGQLKCGCMLN  
STNCTSNLGCVDVNYLLDGYGRCEDKSDEACQIKCVKYAKTLSQGFKCRAKSEYFQLKQSCVLPQINLYN  
NNSYCEDGSDNCFVDGKLCFRCLDGKLMISGKQVCDGVIDCYDLSDEWASRVCGFGFDEVNCTERFYCT  
NSTKDAVSIKQDLVCDGVHDCDKGSDLESLCQYSRFYCLNKQPLSVERSRVENGFKDCSDGSDECEPTSV

FSSPFEMIGNPVFRAFFWVMGIVCLVGNNGVFLHTVLSLLRPDLTQIKASLHWFVNLNLSISDFLMGVYLV  
AISSKGVVEYSGRYCYHDAEWRTSNHCSGFGSLTIISSEVSALTMAMMATFRLISVYEPFKMTHVKWVTFV  
MPTVAAWIVGILLGILPLLNLKSGYFFGYFGETSVCMPKLFSHVGSEAWEYSTALICINFFLFIYMVACY  
LFMYKRSTKMKFDAQRSNKLQKTISLLILTNFCCWIPICIMAFVLSLGSVQLDRIVYVISAGVLLPINSVI  
NPIIYSDVLTIVVRKITK

>ci0100150116

GIYTDNQCNGYNDGDSWDEKNC SHVCELANQTPCSCHLNGSCDRSNRIYWPFCFSERRRCDGKNHCGD  
WSDEQNCEYTCASNERECDCRKNGGTCSKFGRYHRQCYKDRYTCDEDRDCEDFSDETNTCTGSRSVKCGC  
ILNPNNCTSSLGCVEIKDLLDGTQHCKDFDESCEI IKTKWICSYKYYIRNGFVQCEDKGWVIGPNLCNG  
FSDCAGTDELYDVPFGFKCRAVNDYQQHKPSCVLAQKNLRNNNSYCEDKSDICYVDGKLCFKQCLDKKLL  
LSPMQVCDGVVDCYDVSDECLCENQTLCEGRFYCHNKTKLLFSIGKSLLCDGVPDCTDGSDELESVCS  
SRFYCKSKQPLSIARDRVENGIKDCSDGSDECPPVSSKSHVFSPPFEMIGSTWFRVIFWLLGSLALLGNI  
VVFTTSVLELIIISGNTDLLKTSFLTFLINLSVSDSLMGIYLLAISGVGVQFSGSYCHHDAQWRSSSLCSF  
LGTLVVISTEVSALIMATMATFRLFSVYFPIKMRNVKNLGYIIPISICAWLIGILLACIPSMGQSGYFFGY  
FSATSVCMPKLFVKSGDDEAWEYSTFLIVFNILFIYIALVYACLFRKSNKITKGSNKRSKLLQTIKFM  
ILSNFCCWIPICLMAFISLSGVHLDNIVYVVSAGILLPINSVLNPIIYSKVALTTIQKLRGKQTYTVT

>ci0100150391

MIYLDRRSELRTVAGRNLINLVVALFASQLLFLIGSEWTNPPSVCTMFTILLHYLFLATFFWNNVMAYDV  
WLTFGQKGFCSICSAEIKYMFYWGMPGLFVGVCAILEFCVPTIYFGYSYDPSVPICWITNPTANLIAF  
GVPLGAILVCNSVFFVLSIVSIRKVTSKKYRKRYSESQSMGLARVNILLYVKMSSVMGFTWALGFAAVVA  
ETPVLWYIFEISVPLQGVFILVSFVCKRRILKLYSAKFGCAPKPGITGKHMKNGNLLRHTTYIEIYQRF

>ci0100150579

MAVDPDNKRALRAWLCRGITEARHNSWGPKFILFFFSGFLPSTVAVKARSHDEIACQDYEMTLRCPGSDVI  
NVQMASYGRDDRTCASSPENMMDTHCDLPGVLAIVANRCNGKTECTLTVGEGIFEDPCPGTRKYL SATW  
ECVPLXHFPLPWGVGKCDVTKAIRHNANGKCSVGERPIPGNRKXIYVMGWAKYDTPQLYEFSTTDKMSNGQ  
ATTFHHLPYRKDGTGFVVYDGSIFYNKERSRTVVRYDFGTASTAAQAEPLGANYHGTSPYAIEMSTDIDM  
AVDESGLWAIYATEDNDGNIVLSRLEPYSLKILNSWRGTGYDKLSALNAFIVCGVLYAVNYETLMIDYMYN  
TTSNLDKQINIPIPGITRRTSSIEYNSKEHKLYMWDQGVAVEYSIDFVPITAAPPTTTTTIVLPTISSTV  
SPTTTTTTPQSPVSRITTTTTPTVAKLCKGEKASGLMWPDTAYSQIAILPCPGVSAVQAIWICGGNKSH  
KWTNTEPDL SQCTSQWIKDLMIELGVKSASELSVKFVSLLRQKQELASWDISMSIKLLRDFLDHAEHEP  
LSSAATITDSTLKAASLLLDVLTPTWKGLGEVVQTQLAVQLATILEDASYLLAKDMATEIPPPPTSSM  
ATSRTGQVNNVNSQPFVTLGKIVAPIDLSSAKSRKFQSKARTRATGGSDPKHEFTHWRTGHSDTVKNV  
NLALVEASNPGSSDKLAVVFI SCKTLGIYMEDKNSIGSPRPVDSQVISISMSRINISSNNSPVLSSSSG  
HEVELKKPIQMTLQHRNVGFRHHVCAYWDNSGKWWRAGCRRTSGNSTHSTCECDHMTNFVVLSSNEPFA  
MGADVSNPPIVQPSTQPFIIYLVNVRAGLVTAAIMLVFVEVTLIVYSKSLDVNTIHKNLVASLLLSQVVFL

CGINKVNTPTLCSVVAGILHFGILSVFTWSTLEAYHLLAALNDVLTNRNRWKWYYITGYGLPAAVVMVSA  
AVNHDGYGSNDACWLNSNSDFIWSFIGPCILISFSVVFLLVLYKLHSYNTNFPEIVEAKVTRTGAAGA  
CVLTCLLCLMWSFGVMWVSKVEPQLSACLFCVFCAFHALGCCLLYCLIPVDVRQVYGKCFPGLKTS  
PHRP  
NGRHRTTRGIIDGTSGVRLVSTDPTRHDGTSY SAYHFTAGSSASGALLPVHNSQTLGLSKTAAAMKEEGR  
TAASTSMSPHDLVASSNVSREQRCMTHGPIRSNNVFDDETEPKLPTSVACRSAGPPCNQYLHNSRTECFD  
GQHPNTHYEKPYCECSLAHSQCSGRYDHLHECEQLRSPLRQHPHHPSCETHRSYNTNPNHLYETLGPFT  
DSLRMASADGSSTPNHGLCEQCPSAVPYRHRYEDVEPRVVHVSTPQQSLAGSSSDVQHTKQPRLRCLND  
VESGEDTLGKSRENSSIGRKYIKMGTSGLRDPNNCGCYNTARTGRSSDPLSTDQGYDTSQQPNHLCAN  
PNDSGELPPTPPSNLLVRSVPLISEEQTRLRNIHSNPSVANSVRKSVGSHVEDPASDASDSSSENDREVE  
LLTSAQSSRSVVDHESEITQLYDELAASTSQPQSYGQYPSHETEPCLPSDAVDRLSPTGTVSSWAAVPGS  
NPRSVNPSYGRKNSRKTTPDKVILANARRRQESEESRHSDHLEHRNTSYTLPGTAAAGTKARIDLRTGG  
ISMVTNL

>ci0100150689

SPDPLKTVVLPVSVFGIVCIVGLLGNALVMYIIQVKIRKNSLTDIYVINLAVADFI FLAMLFPWSTELAMN  
GRWVFGVRLCKLTSGSTHFMYASVFFLTAMAVDRLMAVVFYRSCMGNRTRRAAKVGS AVIWIISIISI  
VPFYFQIISKTRSGNIRHCALTVSILYPTTVLYTMVLGLLSVIAFTLPFLIISICYTWIVVFLKTRKTS  
KLTSKRQVWLISSTTMVLVVI AVFLLCWLPNQVSNAIYAAQSFNLI LHYYIHMFS TCLA WAHSCVNPMLY  
CFMREDLK

>ci0100150802

GVIGPSSSAVSIPTAKLLGLFDFSQISYAATSPNLSDKQRYPYFFRTTSSDKFQVRAIIQVLQMN  
GWEYV  
SFIHDNDDYGNAASEEFQKQITETNICLSANIRFPRNAGKKVINDVAQSLIRETRSRGNLFCFRN  
NLYLV  
NVCIIISXLYGNRFQWIGSDIWNQFQVQDLQHDNTDEALHQVMDGSLSFSGHSRDPDEFENY  
LKPITLN  
ESLDRNFLYAHYLA SLHGCSLPGSSSVQQNVCLGNLTLPNSTELSHMLQTSANAVLAF  
FAHAFNDAQDLC  
NGTGVPVCDFAFTKLNIGIQRKYLQNVSFIDGNQERFQFDQFQDGPASYDIWRYNGTEQK  
WKLVGYYAKEK  
ITFTDNRSEKGRGNITSVCSDPALNQYMLVSEERSCCWHCITCKENSIVIYNVSN  
SGRNVSKCQSCGNQ  
QMTDSTFQTCLPVPVDYLSFSHGWAAGVICVSCVGLVLTICTGIVYICHWDTPIVRAS  
GRELCCMILVGL  
LLTFTLSFFFCEFTKPLCVMRRLSTGLCLTLVYSAILVKTVRISLIFNTLGKKLVRDYK  
KLLKMPQLI  
IAIVLSAVEVFLLIWFVMPQPNIVKSRSHKEVVLVSRI SLFGFLINVVYQNFQVILIGL  
FYPIILLVLC  
TYAIVKRVKVPAGFN EAKHIGFAVY TALVICIAQIPTVYVNTSSNIVLRDAIYCLGLSL  
NGLVILFAMFG  
PKTYIIIFRPQKN

>ci0100150840

PNPVFAVVSVALVVLGLFGNMVVAFIILVLQEQYKKS VANWYIQLALADTLFLLMLPFTASSE  
LVGQWTY  
GVELCKVKEAILFINYYASIFLVVMSFD RYVAVTKAFASSLVTRLRSPEASYIFTTAGWII  
SILFSVP  
LFMYSSVSGCHCAYQFPSYGHEGYMESY CQHVNFVFAFCLPLILISFFYGMIIKTIMQSK  
KVGNNEAQR  
SYRRRVTTIVLALVFLFVASWLPWHSFQLAKIVGFPM PAESCTNFQYGV RITAYLSSALN  
PFLY

>ci0100150930

MAAGNSTTAAPSLDLDFLNQQPQC NKPSQTGCVDLGNTTFCGSDLPYSQTSFELVTDADTL  
AGVKEKLLLLW  
SGIRAVPLCWDAIQPLLC SVYFPEC GENKIQLIDRKVCQATRQPKIVEVEYGWPDFLRC  
DNDVYADQC  
ESPSTKLLKFNASGCEPPLMATTPASYYDGV DGCGLQCMNPLFNEQQHVD MHVFIAVLA  
GLTCTICTLFA  
MLSFFVDWKN SNKYPARIIFYINLCFFMACIGWLAQFFSDARNEIVCRRDGTMR  
LGEPVGTGESPCIVI  
FVLVYFFLMAGIIFWFDILSYSWFIMYKALNTRK DPLVGKTRKFHLAAWCIPFVLVLA  
CLGVSQVDGDSMS  
GICFIGYKNHMYRVGFLLPVGLVLF IAGFFLLRGLAALFSLKNQQSGLLSDSAVSKIT  
WTMARIGIFTL  
IAFVVFVITFAVHVYELTHQAX

>ci0100151225

MEKQFCRSRGERVYGVYWRTERCNGYND CGDWSDERNCSDVCEFYNETTCACHLNGSCDR  
SNLIYFWPC  
YSERDRCDGKNHCGDWSDEQNCESTCASNEYECDCHKNGGTCSTFGRYNKQCYKDRHIC  
DEDRDCEDFSD  
ETNCTCGRDSVKCGCILNPNNCTSNLGCVAIKDLFDGEQHCKDFDESCEIIEVNTRRY  
VPYYNDEVQKE  
VATTSFFLCNKSNYDYILELNKTRPNKRSCDQIDFYSSDSLTLTETKWICSYTYLLQNG  
FVQCEDKGWVI  
GPNLCNGFSDCADGTDELYDVPGFK CRAVNDYQQHKQSCVLPQKNLRNNNSYCEDKSDI  
CYVDGKLCQFQ  
CLDGKLLLSPMQVCDGVVDCYDVSDECLCEDQTLCKEVLGDSKKLCSTGQILCNGECL  
PSEQVTCNKSLN  
CDGGSNTKYCNKPNANNTVARTGTGHI FCPTDRLFTIYKNATMCDGIP EGYDRADEC  
DAGCPNQTHFCDV  
PLRCHQRQASAVWEKRGQLFLHKREYCDGIPLAFVPLCNTGFDETYCQGRYYCHNKTD  
LLFSIGNLFLCD  
GVPDCTDGSDEWESVCSASRFYCKSKQPLSIARDRVENGIKDCSDGSDECPVSSRN  
LVFSSPFEMIGST

WFRVIFWIMGFVALLGNIVVFTASVLELKSSAHTPEVKSSFLTFLINLSISDSLMGIYLLAISGVGVQFS  
GSYCHHDAQWRSSRLCSFLGTLVVI STEVSALIMATMATFRLVSVYFPIKMKNVKKHSYIIPSICAWMIG  
ILLACIPSMGKTGYFFGYFSATSVCMFKLVKTKDDDAWEYSTFLIVFNFIYIYIALTYGCLILRSKKV  
LKGSNKKSKLLQTVYKMILSNFCCWIPICIMAFISLSGVKLNIVYVVSAGILLPINSVLNPIIYSKVA  
LATIRKLEWQQLSSVNM

>ci0100151327

CKGEWDKITCWPNAPGRTVRLPCPEYIIDFDHTGICHALRHCSRDRWAMVRDTRNTFSDYSSCNIPRE  
EDVVEMIRRGDLYTVGYFSFLVALVFAMIILAYFKRLHCTRNYIHMHLFASFILRAVVI FVKDRVLYYG  
AGILDINTPDGEMTLEALKNRVDEIDADRSSYLIGCKLVMTLFHYFVATNYYWILVEALYLHSLIFVAFF  
SDKKYLWRFVSVTGWGVPILFVVPWAIVRAKFEDTGCWDIAVTEYKWIYNGPIIVANVINFLFLNIIRVL  
WYKMRERGPIGKTDNRRQYKKLAKSTLVLIIPMGVHAI VFI GMPDDISSGTWWDIRMSFDLFFNSFQGGF  
VAIIYCFNCNVEVQA EFRKAWERFNL SVEIKRGRRERSRSSVTMLTSFNSSASQQRIMTS

>ci0100151346

MTEVGLNFSFCGEEAKLLTEANFTKCGRQVFCGTLVFCEYEAMMNTSLNFNASLKCSTAGLIINLVIMSL  
LSFIIIVGNGLVIYIMIKKRQFHNFQMKMSLAFADILMGLIVIPGLIESMVLMMFFRANPEGLSFLCLYE  
RQSQAHRGKIVLYGGAATGSVAASLYSLLVLSGDRFFAVVRPFYIQRVIAPKRHIVKIIILIVVWVMSIFL  
TSIPLFWDDITYRLPIWMFASAPLGSPCNMIA SVFPIVVLAI PYGATVGLTLATLKITTRNLAEAEAKRG  
MGRGSLVRKESLVSTRFSAFQNNSETRQVYKSFMGKFYYAFMVYWLSPLHTNWWL

>ci0100151424

MSVLNLLVLWCWVVGSSPWVSSRTSGTAGVAMADSQPPQTRKSPPCQACRCSRNTGFGYSVDCSSLDLNQ  
VPSSVDELTTFLDL SVNNISV VASKAFSNLHLLQELHLEHNQLTEYPRPVTGLTKLRELKLNNDNKIQRLP  
DRAFSKQTNLEILMFHNPLKSVGRWFTNLRLNELLEIVGVEEQEHFPDLSGCNKLRFLVVGGRFTQI  
PDTLCGKKSVLQRLIVANNRLQNLGGISNCKMLDGLDISGNALKSLNENEMSNLTFRLTDLSENKISSL  
AENVFGHSLKLVKLNLA YNSFAYLP I RGLS QLRKLNVS GVKMMLYL PPIQFMNHSQLEAAYPYHCCQVSN  
EVNNLIKDTDLIFQFTYELWVRAHEYEYVWGPDEI IKQSSPAISCHPEPSALTPCDNLLPSVVVRVWLW  
VLV FSSALNMTVFVQSYDSTGVS SDTFELALCHLAFADVFAGVYIAILVAYDVTTRGNFAEHGAWWQQL  
MCRTAGFFLVMLGLQLSFFT VLIATVERYLATMFPLKPEKHI SKAVLGLT LSAAWV I SIATAIVTLVSGEE  
GFPLQERSRRVLP LYN GATCLPWSTHF KYVAVLVGGHVIACLGIVILCVLMYCARRKQSWLSAQKHTRRQ  
ISLTVACNVTLILPLALIGLLASA EPAKLNVDLLLTMVMLLISLRFAINPLLYISFSESFRRDMRAAAGW  
LCCTIRRNRY

>ci0100151600

MYSNSSQQQSSQSEATASIVAICIVSALASVLTVGGNVMVIVSFVINRSLRTVNNYLLLSLAAADLLIGL  
VSMNLFVTVFIVSGSWNLGAVLCDLWLALDYVASNASVMNLLIICLDRYYSVTKPVEYRNRRTPKRFITAI  
IGAWSVSFILWAPWVIFWQFIVNERTVPNDNCYVQFIKDSKPMAVITALAAFYLPATVMCVLYWKVYLG  
KNRRKKIASSHVKT LASEIYKNENAALDLPPVEPQVVEEGNVFNDSV FASPADPPTPSDES PAHVLKNYD  
AGGEVPEPSVRMTSPSDVTGARQMLVAVIRQRHGYIEEKVEAKNAIDNMEDDSSDFETF DCTNGNLI IEN  
NAKSPKRHSFKSYGKTKRPETSSRSRTNSGKVMFIRRQIKEKSSDTE SAADVGGV I KVTERLKLQVVK  
KKLQSLNKETKAARLLASILAAFILLWLPYNIMALIEAF CPLESEKIPDLAWSFGYWSCYLNSTLNPVCY  
AMCNKNFQETFKFLLSLKWVHPDHRFRPQMV

>ci0100152008

MLQANYRQRCVFWFDFATSDWSSEGCGLDVTKQPPTCECSHLTNFALLVVSLIYSIINHKVTVVVTWSHA  
VIYNVCIAAYVAIIIIILKIRNKTSTKIQLHVCFNLMVAYLLFMIGVPSVGNKTTCTIVAVLLHYTFLTSW  
FWMGIYSNRLYVCLVKVFP RPTTNYTWKSSIFAYGVPLIIVSINAGLTLADNV CWLHWSLSYFGFLLFVG  
IILLNNLVVFLVNLNQLCWRESEIRSSANKQRKSHKVMLACSMIFMLGLTWMVGF LMFVSTNVVYNKVT  
WLF TICITLQVTKGGVYLRMAGQRQLL

>ci0100152581

FFCSIGYIIYFYVITKRKHLRRKYVWMTSLALADFF FALNLLPILISLVKDKWVFGIYGGLVNSILSLSS  
GFVGIAGAQQGIAIHRHEVEQGKGCQLKYIYFRIGMAWVTGIAMGVVPSLGIGHYEEATETSFGCLLDMSK  
SDLSSFIYMVACFGFFAVFPLWRMVTSYKLIKMNKANWVSTSVLVIPVVFVLCYAPFSVHALAAVKIPH  
HVPSELEIVLVHCGPKILIAFNPFMYVLTNTELLSAYKSVI

>ci0100152622

QTFWFQFDLHLVRLVTWLLFCLSMAGNMFVLSLRGSKSRHFIMFHLALS NLVYTI FVMPSDAVWNTTM  
EWLAGDVMCRLCQMMKQFGMYASSFMVVVIGADRVTGILSPLPCHSQRKRGYMVATAWISSLICCLPAG  
FIFSVASIPTCEGIPIYQCIDFNVLQDVSLLRPYFFTMCSFLLPLICTLVSYSLIVCEISNMKERDRV

LMGRRHSVNTASIQRAKNRTILMRTLITLTLFVLCWGPYYGKGIYDWFIRYEDHTPPDAWDTVMYVVMYLN  
PVLHPVIVFGVFLKEIRGKFKQRLNLCARKRFFKQRFKTVPNQAQSSMNYSIASVLNRPRRMSSTSRGSFSS  
YATGATHLNGSSHVTINGQCSNNGSNGSIKTQPHFFGANRMAAPQQQLLSSESAL

>ci0100152670

RNITKGGIFPMSGGWSGGQACYPAAQMAVEDVNRRSDILQGYKINLVKKDSKCDAGLGTRKFYDLLQDSR  
IFTLTGTGSSVSTPIAESAYLWNINVMAYGASSPALSNRSRFSPFFRTHPSANLHNPTRIKLQFMFGWKR  
IGIISQGSEVFESTAKDLRTRLIQENMEIVTQQSFHADPKVAVQNLKKVDVRIIVGLFYEGAARKVMCEA  
FKEKLFGNRYVWFLIGWYKHGWHKVPEKGVDCTEDEMADTVEGHFTTEILMLNPTNDTTVSGMNTQEFLO  
RLSNTTTDIHLKGGYEEAPLAYDAIWAIAIALNNSIQRLQTSDLTRNNGLILNDMYRSLNASSFTGISGT  
VVFSDSGSRMAWTKVERMENG VYKEILYHAEKKIMKRINKINWKQPPKDRMTMTVKRTLKLSTSAFVAGG  
AMAAMCGFFCVACLCTWTKERNKLIIPGSSLNSISLFGFLLLSAIFLSGLNDITGPICEVRAWTLISI  
GFTLAFSPLFAKLWTVNDLHKKMIFDGRSTKKKKDKVFTLNTETVVVMVPLVLDLIVLITWSCIDRLV  
QSKSKLAPYEEGEVIINPELKKCVSNYTTIWIWGMFAYKAIQLLLGSFLAYESRSKIESNSDHKT VAGAV  
YNITVLSLLCAPILMILGDEPNLSFLFLATPINMCTITSTAIIFIPKVNMLKXFRRTGSNRSVAVQVRPP  
ASNHIESEEQKLERENRILQEKIAEV

>ci0100152713

MELEFGITRTAYGIAMLMMAAVATFGYSVYILAIWSSKKLQTKHIWLTSLACADLLMMVHLFMDGLSSFH  
QGRRPKGFIFECQVYAHMGLFSGFVSIASMTWICIDRYRKFKEKVG VNYCFYVIIVWAMSFLAASGPAL  
GFGAYESA EENTVKCLIDLENTDMNTIKYFVVVGLFFFYPIFKMIKYNTKFAYKSEEEKAVVIAAPVSVF  
VLGYLPYLVYAACLKLTIGLPLNQASIAFLYLLPKFISVMNPMYMRSDPELLRAAKRVV

>ci0100152766

CVYWDEVTLTWSVGVMTNNSNTTLTCTFNHLTNFATL FVNDTISISNSHVL DILTVVGC SISGASCLLL  
ILIFIFVPTKGRKRAVLLLNLAI AILLDDIFLIVSEQEIVTSSMTSCLAVSVLTYFSMMSVFTWMMVEA  
YLFQPFKTRGKLFGNWFMIASCLGWLLPALVIMFTTIFNIDMYKRTDGDVTNSFTRCYIQPGLVLYAVL  
IPAGITLGVNMLYVFLTYKVTCAKRPVSMAGKSKGLQKNLLFSLTLFVTLGLTWIFGFV IIPGNGDASF  
AFSVLFTVFNSLQGFLLFLLYVVRQKFTRSAISEQVRKISAFVIPTTWSTS

>ci0100153146

MTTAAFTQTYADRIY PSTATNTFLPLCQSHDTILQTWFQFDTLHLVVRVLTWLLFCLSMAGNMVWLWSLR  
GSKSRHFIMFYALSDLIYTFIVMPSDAVWNTTMEWLAGDVMCRLCQMMKQFGMYASSFMVVVIGMDRVT  
AILSPLTHEGQRKRGYCMVLAAWTTSLLCCIPAGALFSLLTVETCEGINVYQCVDNFIVKDRSLLRPYYF  
FTMCSFLLPLICTLVSYS LIVCEISNMKERDRVLMGRRKSVNTASIQRAKNRTILMRTLITLTLFVLCWG  
PYYGKGIYDWFQKPAIGPPAPLDTAMYIVMYLNPVLPVHPVIVFGVFMKEIRSKFKKTSIAGLKQKREQVRS  
GSVSRSLT SYATGLTQVQDL PNGAAETT VLTGATQQVPSIDESVHTKAPE

>ci0100153351

MSDECGGNGTCTETFTCTDDGSCIALSRFC DGTQDCANGEDEIESDSTLGNMAVSCSNRYQSINNKL YNTH  
TNRVCSLPLRHVCDGVDHCENRTDECQEGCVHSLFC DGGDTCHHRSSLCNGESECSVRKSQVCFVADCE  
DQSDEADCHASHFYCEGGKPFVVDKRYMFDGKRDCEDGSDEFSSAENMIESRFLQVMVWVMGILAIIGNA  
AVIVHTISLLCYHARRKLTKVAVVYSCLVLNLSIADLLMGVFLIALGIRSASTSGNYCLIDHSWRS GTPC  
SVLGTLAVLSSEVSLTLAILSSYRMFCVIWPIQSRTLQVHFSIGLAVSTWIFAGTIAFIPLSKIYLYGYY  
STHATCLPKLFVDKRDLGWQFSLTVTITNFILCLYIVGAYAVIFRPRQVNKSSVTSQGTRNMQKRIAILV  
ATDCACWLPICLIAFLIFSGVEISNTVYSITAI IILPINSALNPLFYSNAVQILFTRILNLSKFETFNA  
VRKSIAGITIFKCKWTATEKREGQDGKNLLRGHEDTDGGHIVKMKSHVTEHTVLDTVMTESVV

>ci0100153483

IGQLYPTIMTHVISADIRNTVMQDLKHPVFIYHNI PNHNQNF PKIIEPDVKSKTAE LCVFWD FANNGDG  
DWSQNGCSMINSSSIIGSSNKTHLVTCS CNHMHFAVILSTTLTYEPQYLTLTLTIIGCSISIIICLLATLG  
TNLYFRQLRTRKLPQQVLMHLSGSIILLNLLFLIGIDLNKNDTSCFVVALFLHYAVLLVWCWMLVEAVFLF  
RTLVI TRV ESSGKCFIWSAALISYSAPAI VVAASASSLPKESYQSMKYCWLASDPLLYSIVYPIAVMLS  
LNL LIF FIVMYNITYRSQ MFRKNVNL RKISQAVKRALCMLVVLGLAWVLGYVMLLSQDKATKDIF TILFT  
ILNSLQGFVFVILYCFRQENVRNLWLRPL

>ci0100153785

MDNLLNATVGP NLSATTATPNPWYGIYGFQRTIEIVYLVCIILLGTLGNMLVICSIKSASRTHVSGNIFI  
VNLAVADLLVTAVLVPCVLANVIATENTLPNFACRVVAF LMSTACACSIHSLAAIAINRYWAIVRPCSYP  
RVFSKKNTRIMVCGIWWWT CIPFVPAIMLAEQPYDYMIMECLWDDKFSNSYTIISLVALLMVVFPFIVICLC

YERLYHIVKKRSKWLMAQGSLENNTTMTTEAALDRDIRLLKTVAVIITAYMLFWMPYGVMI IAGKLYIPPV  
AKKIIGWMAFSNSAVNFI IYGVMNKSSRENYKHFLIRLLRGEFCGKAKPPTPNI SVYTMNSPAGQRKFNT  
QATMVESRREKQLVHKLNVV

>ci0100153810

FSSDQFLINSTILRVSVGVVGI IAVAGNILVLCQNGNRLRNARRNESDIVSSSRVLAINLALADLMIGVY  
LIILGVKDVMYQGVYCYHHLKWKSSIFCTILGCVALVSIETSMFVLTVMTTCLRLIVVKSPLPGSISVRKV  
VWSVVLAVVVSIMFAVIPLLPQLDFTMAVCFGYSSHGVCLPRIFPNSSLDKSSAFSMFLMVINFAAF  
AYIVLAYLMIYRIAVVAACKAGRTDTSRAIGLQKNITRITVTNFLCWVPVCIISFISLTTGGSDPTSYAV  
AAIVLLPINSATNPFLYSEVIGSVWKTMPRLPSFRSSRDQKADENTSPANGNFTTTTIRLSNKIYPFCS  
ETT

>ci0100153844

SAVVVPMTTFALGVMSNSLAIIVTLLSTVKKRSRKKVKGFPHTLVLTAVLVDLAGTLFTSPITFIFYFNES  
HILGGTPLCNYSAFAMMFFGFTTMAMVMTMSIERLMSIRHAYYYHRKATATKALLVVLAIFIFSALLCAM  
PTLGFVKVRPMFPYSWCFADWNAQAPKDKAFNFLYVSLGVTMLFVTLVCNARVIKGLVEMKKSQVCRRLK  
NYFTATVTAVEPKRNVVKLVALLGLAFLCVGRIRPVVWKNRNVISKWNRKSRRTVSRETQMI IQLLVIT  
LIFVVCWVPLMFRIFNFQLGINLSSKRDLVAIWLVAVNPILDPWVYILFRKSVARCVLRLAKTIVC

>ci0100154093

IISLLVSIILIFVIVLGNFLIVA AVYNFKHLRTTQYFYVCSLATS DLLLLGVLVIPLNLVREMYGYWPLGET  
ICKIHLSDILLCTASIWNLCMISISRWWILSAKSCSFLRSIPNRLCIFMVVCVMMWSALVCAWSFDAYQ  
QVRSRRFVLYRQKLLHTTGLIMGAFVFCWFPFFQAHLTQILCPTCCVPASLLNFLAWLGYCNSALTP I  
IYTTKRSELKAFKAFKILL

>ci0100154135

YIILEVLLGVLSIFGNALVCYVVLHRSRTLKVKVMYMFVTS LAVADICVGAIAIPFAILTKLGLPRSSPFL  
CVSMLSFIIMIPTQISIFNLMAISVERYLSIRHPRIHYNKLTVDKSLTVVVLTVIVSVVIGMLPLFGWNKI  
SNPPGKQPIPVKLLSRTPVMDFDYMFNFACVLPPLITSAILYFIIFVSVLRVQEKSQHHNERHVRV  
REMRAAVLALIVLSFAICWMPIHILNTIHSCFSFRFDPSRVI PAYVYNVAILLSHCNSTVNFFLYSWRL  
KAFRIHLHKRVLNKLKRN

>ci0100154142

MENNYSQYIEPSLYWERND SVVYELGYAIIPNRVLLPIDYYPIDINDLENGTAAAARNQTNATAYVSVL  
CGFPSFCSYSAYNVCNNTTLEECDECSMIGAGFFIFACVVLGAMILIGNSLVFWYNFRNSIQDKFSIMKA  
SLSVADSLAGIQIFGVVLYNVSWTINSTSQELDMKQLLYQDSPQAIIGGMFYIMSFTSSLFHLLYFSGQR  
LFAVTYPINYKIQSNAHVAFGLVLTWILGVISATVPAWFNTYTYSYHTIYFLPSIRNYSSTNNSSSG  
AALALVFVFSILPYCLMILTITSALQIRIRLIRSASLSKSMKDLLKKKEVKLIKTVAIMQIGFTVTLV  
PVVILVLFYAHVFSCKNVSTPYVIGFYMSMSNSLVNVLVYSGRDSKFRAWLKSIVTCKSVPKEDSHTS  
FSATRHNHAKATTETD NAIQTSKIVSR

>ci0100154445

MYLIPGTIGNLIAIVVYISNKKMQTAFNLLIVNLAMIDLITSSTIMPIILYGYITQSWPLSLTACEVFAF  
FYSAHFTSTINLLMITLNRMHVTRPHATYKIIYSVKRRRILTLIAWSISPLCLLPLLFTNGFSWWEAG  
YMCAYSRLEGFSNVYSLFLGVLFQLLPFLLMVLYIFIFQTVKRSHANIDNPKIQGEYWTYDAADLSLET  
NVSLHHAKTQRQLIYMSITICVAFVAVCALPSVIMNLAATYEDIPPVHMLGNSLGLWLNAMINPIVYAAMN  
SQFQKAY

>ci0100154507

MALVSWFLILCLLLSVICCCVKGDVCRNKSTAFGFRCTCKTLKVPCKCQCRPHENTTWKRQKRVGCD  
VYDCYDNFDKCRCTFNQPRTRTQVYIVSCCYNISFPKCTKPSKKNIFASADDLIGNVYLRILFWLVGAF  
AFLGNSFVFLRTVAKYTRTGNQSVKQGFRLILNLSLSDCLMSIYLIAISIQGVYIYRSRYSSAHDLIWRS  
GKTCQLFGVLAITSSEASAFIMVTMTSFRLAAVCFPFKMNARQIWRISTTIAWLFAILVGTSPA WNTK  
ITGEFGYFGSTSVCMPIFNSTLEDEAWEFMFLIILNLLFIYMAICYLVIYKINSNPHRRQEGRKLKRR  
ISILVATDFCCWVPVCMACVSFNGTRLDPTAYIVSAGFLLPINSALNPIIYSKVLGRSINSAARWFSNK  
CSRLPKSIPKISSKLNLTSDQEMARGSLRETESSL

>ci0100154530

MALVSWFLILCLLLSVICCCVEGDVCRNKSTAFGFRCTCKTLKVPCKCQCRPHENTPYKKQQRNVVCD  
VYDCYDHFDRGCTFNQPRTRTQNYTVSCCFNRSYPNCTKPSQKEHTFASANDLIGNVYLRILFWLVGAF  
AFLGNSFVFLRTLAKYTRTGNQSVKQGFRLILNLSLSDCLMGVYLIAISIQGVVYQGGYLSAYDLI WRS

GKTCQLFGVLALTSSEASAFIMVTMTSFRLAAVCFPFKMENARQIWYRISTTIAWLFAILVGTSPAWN  
TKITGEFGYFGSTSVCMFNIFSTLEDEAWEFMFLIILNFFLLFIYMAICYLVIYKINSNPHRRQ  
EGRKLKRRISILVATDFCCWVPVCMACVSNFNGTRLDPYIIVSAGFLLPINSALNPIIYSKVLGRS  
INSAARWFSNKCSRLPKSIPEKISSKLNLTSDQEMARGSLRETESSL

>ci0100154564

MEVNDKRVIYGVLMGLLGLLTITGYSLLFVIFAKRPDLKKNKFLLSLATSDDLITVHVFASTIAAFAPQW  
PFGDLGCQVDAFIGMAPTFISIAGAALIAKDKYYRFCKPKMVGRNYSFHVYLTWTMGIIGGALPFIGFGR  
YGFETDDVTWRTGCLLDFKSISAKYSFYIILISTVWFVWPVYKLVSSYMKISTKINKFYPLLFVVPVQMA  
IGLLPYAIYAMVSITIGVSAVPYFCVWINNLAAKVFGSNPFIYIYFDPELRESCQIFCSPPAPTNDKI  
SEDSKDE
